# Supplementary material for: Antimicrobial Secondary Metabolites from the Mangrove Plants of Asia and the Pacific
Source: MDPI journal article supplement (doi:10.3390/md20100643), 2022-10-15
Supplement: s1 [file s1]

Table S2. Antimicrobial activity of extracts and isolates from the Dicotyledons from the mangroves, tidal rivers, and the seashores of Asia and the Pacific

| FAMILY<br>Genus, species<br>(synonym)                           | Extract       |            |           | Antimicrobial principle(s)                                                                                                                                                                                                                                                                                                                                                                            |
|-----------------------------------------------------------------|---------------|------------|-----------|-------------------------------------------------------------------------------------------------------------------------------------------------------------------------------------------------------------------------------------------------------------------------------------------------------------------------------------------------------------------------------------------------------|
|                                                                 | Antibacterial | Antifungal | Antiviral |                                                                                                                                                                                                                                                                                                                                                                                                       |
| ACANTHACEAE<br><i>Acanthus ebracteatus</i> Vahl                 | •             | •          | •         | Antibacterial: 3,5-Dimethoxy-4-hydroxy methyl benzoic acid ( <b>74</b> ), (Z)-4-coumaric acid 4-O-β-D-glucopyranoside ( <b>75</b> ), 6-hydroxybenzoxazolinone ( <b>76</b> ) [241].<br>Antibacterial: Acornine 2 ( <b>63</b> ) <i>C. albicans</i> , <i>T. mentagrophytes</i> , <i>T. rubrum</i> , <i>S. cerevisiae</i> , <i>T. clypeatus</i> at 50, 50, 100, 9.3, and 150 µg/disc, respectively [212]. |
| AEGICERATACEAE<br><i>Aegiceras corniculatum</i> (L.) Blanco     | •             |            |           |                                                                                                                                                                                                                                                                                                                                                                                                       |
| AIZOACEAE<br><i>Sesuvium portulacastrum</i> (L.) L.             | •             | •          | •         |                                                                                                                                                                                                                                                                                                                                                                                                       |
| ANNONACEAE<br><i>Annona palustris</i> L.                        | •             | •          |           | Antimicrobial: Kauranes [26]                                                                                                                                                                                                                                                                                                                                                                          |
| APOCYNACEAE<br><i>Cerbera manghas</i> L.                        | •             | •          |           |                                                                                                                                                                                                                                                                                                                                                                                                       |
| <i>Cerbera odollam</i> Gaertn.                                  | •             | •          |           |                                                                                                                                                                                                                                                                                                                                                                                                       |
| ASCLEPIADACEAE<br><i>Hoya parasitica</i> (Roxb.) Wall. ex Wight | •             |            |           |                                                                                                                                                                                                                                                                                                                                                                                                       |
| ASTERACEAE<br><i>Pluchea indica</i> (L.) Less.                  | •             |            |           |                                                                                                                                                                                                                                                                                                                                                                                                       |
| AVICENNIACEAE<br><i>Avicennia alba</i> Bl.                      | •             | •          |           | Antibacterial: Rhizophorin B, <i>B. subtilis</i> at 500 µg/mL [246].<br>Antifungal: Excoecarin A ( <b>77</b> ), <i>ent</i> -16-hydroxy-3-oxo-13- <i>epi</i> -manoyl-oxide ( <b>78</b> ), <i>ent</i> -15-hydroxy-labda-8(17), 13 <i>E</i> -dien-3-one ( <b>79</b> ), <i>R. orizae</i> and <i>A. niger</i> at 500 µg/mL [246].                                                                          |
| <i>Avicennia eucalyptifolia</i> (Valeton) Zipp. ex Moldenke     | •             |            |           |                                                                                                                                                                                                                                                                                                                                                                                                       |
| <i>Avicennia lanata</i> Ridl.                                   | •             |            |           |                                                                                                                                                                                                                                                                                                                                                                                                       |
| <i>Avicennia officinalis</i> L.                                 |               |            |           |                                                                                                                                                                                                                                                                                                                                                                                                       |
|                                                                 | •             | •          |           |                                                                                                                                                                                                                                                                                                                                                                                                       |
| BIGNONIACEAE<br><i>Dolichandrone spathacea</i> (Burm. f.) Bedd. |               |            |           | Antibacterial: Decaffeoyl acteoside ( <b>80</b> ) and verbascoside ( <b>81</b> ), <i>E. faecalis</i> and <i>S. sonnei</i> MIC: 31.2 µg/mL [247].<br>Antiviral: Verbascoside ( <b>81</b> ), RSV, EC <sub>50</sub> : 0.8 µg/mL [248].                                                                                                                                                                   |

|                                                          |   |   |   |                                                                                                                                                                                                                                                                                                                                                                                                                                                                                                                         |
|----------------------------------------------------------|---|---|---|-------------------------------------------------------------------------------------------------------------------------------------------------------------------------------------------------------------------------------------------------------------------------------------------------------------------------------------------------------------------------------------------------------------------------------------------------------------------------------------------------------------------------|
| BORAGINACEAE<br><i>Cordia dichotoma</i> G. Forst.        | • | • |   |                                                                                                                                                                                                                                                                                                                                                                                                                                                                                                                         |
| CASUARINACEAE<br><i>Casuarina equisetifolia</i> L.       | • | • |   |                                                                                                                                                                                                                                                                                                                                                                                                                                                                                                                         |
| CHENOPODIACEAE<br><i>Salicornia brachiata</i> Miq.       | • | • | • |                                                                                                                                                                                                                                                                                                                                                                                                                                                                                                                         |
| <i>Suaeda maritima</i> (L.) Dumort.                      | • | • |   |                                                                                                                                                                                                                                                                                                                                                                                                                                                                                                                         |
| COMBRETACEAE<br><i>Combretum quadrangulare</i> Kurz      | • | • | • |                                                                                                                                                                                                                                                                                                                                                                                                                                                                                                                         |
| <i>Lumnitzera racemosa</i> Willd.                        | • |   |   |                                                                                                                                                                                                                                                                                                                                                                                                                                                                                                                         |
| <i>Terminalia catappa</i> L.                             | • | • | • |                                                                                                                                                                                                                                                                                                                                                                                                                                                                                                                         |
| CONVOLVULACEAE<br><i>Ipomoea pes-caprae</i> (L.) R. Br.  | • | • |   |                                                                                                                                                                                                                                                                                                                                                                                                                                                                                                                         |
| CLUSIACEAE<br><i>Calophyllum inophyllum</i> L.           |   |   |   | <p><i>Antibacterial</i>: Caloxanthone A, calophynic acid, brasiliensic acid, I nophylloidal acid, calaustralin, calophyllolide, inophyllum C, and inophyllum E (20 µg/disc) <i>S. aureus</i>, IZD: 9, 10, 11, 9, 11, 16, 10, and 13 mm, respectively [60].</p> <p><i>Antiviral</i>: Inophyllum B (15), inophyllum B acetate (16), and inophyllum P (17), reverse transcriptase IC<sub>50</sub>: 0.03, 0.7, and 0.1 µM, respectively. Inophyllum B and P, HIV-1, IC<sub>50</sub>: 1.4 and 1.6 µM, respectively [61].</p> |
| EBENACEAE<br><i>Diospyros littorea</i> (R. Br.) Kosterm. | • |   |   |                                                                                                                                                                                                                                                                                                                                                                                                                                                                                                                         |
| EUPHORBIACEAE<br><i>Excoecaria agallocha</i> L.          | • | • | • | <p><i>Antiviral</i>: 12-Deoxyphorbol 13-(3E,5E-decadienoate) (18), HIV-1, IC<sub>50</sub>: 6 nM [69].</p> <p><i>Antiviral</i>: 5β-carboxymethyl-3α-hydroxy-2β-hydroxymethyl-1-methylpyrrolidine (19), HIV-1, 10<sup>-5</sup> M by 22.4% [70].</p>                                                                                                                                                                                                                                                                       |

|                                                |   |   |   |                                                                                                                                                                                                                                                                                                                                                                                                                                                                                                                                                                                                                           |
|------------------------------------------------|---|---|---|---------------------------------------------------------------------------------------------------------------------------------------------------------------------------------------------------------------------------------------------------------------------------------------------------------------------------------------------------------------------------------------------------------------------------------------------------------------------------------------------------------------------------------------------------------------------------------------------------------------------------|
| <i>Suregada glomerulata</i> (Bl.) Baill.       | • | • | • | <p><i>Antibacterial:</i> Bondenolide (<b>23</b>) (1 mg/mL/agar well), <i>P. aeruginosa</i> 7 mm. Neocaesalpin P (<b>24</b>), <i>S. aureus</i>, <i>S. agalactiae</i>, and <i>P.aeruginosa</i> MIC: 16, 16, and 32 µg/mL, respectively [96].</p> <p><i>Antifungal:</i> Bondenolide (<b>23</b>) (200 µg/mL) <i>N. oryzae</i>, <i>S. atra</i>, <i>C. lunata</i>, <i>D. rostrata</i>, <i>A. niger</i>, <i>P. oustreatus</i>, <i>A. boydii</i>, <i>M. canis</i>, and <i>E. floccosum</i> [96].</p>                                                                                                                              |
| FABACEAE                                       |   |   |   |                                                                                                                                                                                                                                                                                                                                                                                                                                                                                                                                                                                                                           |
| <i>Caesalpinia bonduc</i> (L.) Roxb.           |   |   |   |                                                                                                                                                                                                                                                                                                                                                                                                                                                                                                                                                                                                                           |
|                                                | • |   |   |                                                                                                                                                                                                                                                                                                                                                                                                                                                                                                                                                                                                                           |
| <i>Canavalia cathartica</i> Thouars            | • |   |   |                                                                                                                                                                                                                                                                                                                                                                                                                                                                                                                                                                                                                           |
| <i>Cathormion umbellatum</i> (Vahl) Kosterm.   | • | • | • |                                                                                                                                                                                                                                                                                                                                                                                                                                                                                                                                                                                                                           |
| <b><i>Cynometra iripa</i> Kostel.</b>          | • |   | • |                                                                                                                                                                                                                                                                                                                                                                                                                                                                                                                                                                                                                           |
| <i>Cynometra ramiflora</i> Miq.                |   |   |   |                                                                                                                                                                                                                                                                                                                                                                                                                                                                                                                                                                                                                           |
| <i>Dalbergia candenatensis</i> (Dennst.) Prain |   |   |   | <p><i>Antibacterial and antifungal:</i> Mucronatol, <i>E. coli</i>, <i>T. mentagrophytes</i> MIC: 50 and 25µg/mL, respectively. Clausequinone <i>S. aureus</i>, <i>B. subtili</i> , <i>E. coli</i>, <i>A. niger</i>, and <i>T. mentagrophytes</i> MIC: 6, 3, 6, 50, 100, and 25 µg/mL, respectively. Vestitol, <i>B. subtilis</i>, <i>E. coli</i>, and <i>T. mentagrophytes</i> MIC: 50, 50 and 25 µg/mL, respectively [106].</p>                                                                                                                                                                                         |
| <i>Derris scandens</i> (Aubl.) Pittier         | • | • | • |                                                                                                                                                                                                                                                                                                                                                                                                                                                                                                                                                                                                                           |
|                                                |   |   |   |                                                                                                                                                                                                                                                                                                                                                                                                                                                                                                                                                                                                                           |
|                                                | • | • |   |                                                                                                                                                                                                                                                                                                                                                                                                                                                                                                                                                                                                                           |
| <i>Derris trifoliata</i> Lour.                 |   |   |   | <p><i>Antibacterial:</i> Lupalbigenin (<b>25</b>), <i>S. aureus</i> and MRSA, MIC: 2 and 4 µg/mL, respectively. Derrisisoflavone A (<b>26</b>) , <i>S. aureus</i> and MRSA, MIC: 16 and 4 µg/mL, respectively. Santal (<b>27</b>), MRSA, MIC: 2 µg/mL. Scandenin A (<b>28</b>) (50 µL of 1 mg/mL/disc) <i>E. coli</i>, 9 mm [108]. Dalpanitin (<b>29</b>) and vinenin 3 (<b>30</b>), <i>S. aureus</i>, MIC: 23 µg/mL [109,110]</p> <p><i>Antifungal:</i> Derrisisoflavone C (<b>31</b>), 5,7,4'-trihydroxy-6,8-diprenylisoflavone (<b>32</b>) and lupalbigenin (<b>25</b>), 250 µg/mL <i>T. mentagrophytes</i> [107].</p> |
|                                                | • | • |   |                                                                                                                                                                                                                                                                                                                                                                                                                                                                                                                                                                                                                           |
|                                                |   |   |   |                                                                                                                                                                                                                                                                                                                                                                                                                                                                                                                                                                                                                           |
|                                                | • |   |   |                                                                                                                                                                                                                                                                                                                                                                                                                                                                                                                                                                                                                           |
| <i>Inocarpus fagifer</i> (Parkinson) Fosb      | • | • | • | <p><i>Antibacterial:</i> Lupinifolin (<b>35</b>), <i>S. aureus</i>, <i>B. subtilis</i>, <i>E. coli</i>, and <i>P. aeruginosa</i> 0.5, 0.5, 10, and 0.5 µg/TLC. <i>S. aureus</i>, MIC: 8 µg/mL [115,116].</p> <p><i>Antifungal:</i> Lupinifolin (<b>35</b>), <i>C. albicans</i>, 0.01 µg/TLC [116].</p> <p><i>Antiviral:</i> Rotenone (<b>34</b>) HSV-1 and HSV-2; 15.4 and 24.4 % at 50 µg/mL, respectively [117]. Deguelin (<b>33</b>), HCMV; IC<sub>50</sub>: 55.8 nM [117].</p>                                                                                                                                        |
| <i>Pongamia pinnata</i> (L.) Pierre            | • |   |   |                                                                                                                                                                                                                                                                                                                                                                                                                                                                                                                                                                                                                           |

|                                                                                                                                                                                                                                                                       |   |   |   |                                                                                                                                                                                                                                                                                                                                                                                                                                                                                                                                                                                                                                                        |
|-----------------------------------------------------------------------------------------------------------------------------------------------------------------------------------------------------------------------------------------------------------------------|---|---|---|--------------------------------------------------------------------------------------------------------------------------------------------------------------------------------------------------------------------------------------------------------------------------------------------------------------------------------------------------------------------------------------------------------------------------------------------------------------------------------------------------------------------------------------------------------------------------------------------------------------------------------------------------------|
| <p><i>Sindora siamensis</i> Teysm. ex Miq.</p> <p>GOODENIACEAE</p> <p><i>Scaevola taccada</i> (Gaertn.) Roxb.</p> <p>HERNANDIACEAE</p> <p><i>Hernandia nymphaeifolia</i> (C. Presl) Kubitzki</p> <p>ICACINACEAE</p> <p><i>Merrilliodendron megacarpum</i> Sleumer</p> | • | • | • | <p><i>Antifungal</i>: Scataccanol (<b>87</b>), <i>P. insidiosum</i>, MIC: 5 µg/mL. 4-Formylsyringol (<b>88</b>), <i>P. insidiosum</i> MIC: 10 µg/mL [261].</p> <p><i>Antiviral</i>: Deoxypodophyllotoxin (<b>3</b>), HSV-1, IC<sub>50</sub>: 0.004 µM [25].</p> <p><i>Antifungal</i>: Camptothecin (<b>66</b>), <i>A. alternata</i>, <i>E. nigrum</i>, <i>P. guelpinii</i>, <i>Drechslera sp.</i>, and <i>Fusarium avenaceum</i>, EC<sub>50</sub> &lt;25, &lt;10, 10, &lt;10, and 30 µg/mL, respectively [214].</p> <p><i>Antiviral</i>: Camptothecin (<b>66</b>), VV, 40 µM [215], EV 71, 10 µM [216]. 10 µg/mL, IVA [217], SIM [218], HIV [219].</p> |
| <p>LAURACEAE</p> <p><i>Cassytha filiformis</i> L.</p>                                                                                                                                                                                                                 | • | • |   | <p><i>Antifungal</i>: Dicentrine (<b>2</b>), <i>C. clodosporioides</i>, 6 µg/spot [24].</p>                                                                                                                                                                                                                                                                                                                                                                                                                                                                                                                                                            |
| <p>LECYTHIDACEAE</p> <p><i>Barringtonia acutangula</i> (L.) Gaertn.</p> <p><i>Barringtonia asiatica</i> (L.) Kurz</p>                                                                                                                                                 | • | • |   | <p><i>Antibacterial</i>: Germanicol caffeoyl ester (<b>61</b>), camelliagenone (<b>62</b>), germanicol (<b>63</b>), <i>P. aeruginosa</i> [207]</p> <p><i>Antifungal</i>: Germanicol caffeoyl ester (<b>61</b>), camelliagenone (<b>62</b>), germanicol (<b>63</b>), <i>C. albicans</i> [207].</p>                                                                                                                                                                                                                                                                                                                                                      |
| <p><i>Barringtonia racemosa</i> (L.) Spreng</p>                                                                                                                                                                                                                       | • |   | • | <p><i>Antibacterial</i>: Nasimalun A (<b>64</b>) (200 µg/disc) <i>S. aureus</i>, <i>B. subtilis</i>, <i>S. flexneri</i>, <i>S. paratyphi</i> B, <i>V. mimicus</i>, IZD: 9, 10, 7, 10, and 11 mm, respectively [204]. Lupeol (<b>40</b>), <i>E. faecalis</i>, MIC<sub>50</sub> of 62.5 µg/mL [208].</p>                                                                                                                                                                                                                                                                                                                                                 |
| <p>LORANTHACEAE</p> <p><i>Dendrophthoe pentandra</i> (L.) Miq.</p> <p><i>Macrosolen cochinchinensis</i> (Lour.) Tiegh.</p> <p><i>Viscum orientale</i> Willd.</p>                                                                                                      | • |   |   | <p><i>Antibacterial</i>: Flavonol glycosides [186].</p>                                                                                                                                                                                                                                                                                                                                                                                                                                                                                                                                                                                                |
| LYTHRACEAE                                                                                                                                                                                                                                                            |   |   |   |                                                                                                                                                                                                                                                                                                                                                                                                                                                                                                                                                                                                                                                        |

|                                                        |   |   |   |                                                                                                                                                                                                                                                                                                                                                                                                                                                                                                                                                        |
|--------------------------------------------------------|---|---|---|--------------------------------------------------------------------------------------------------------------------------------------------------------------------------------------------------------------------------------------------------------------------------------------------------------------------------------------------------------------------------------------------------------------------------------------------------------------------------------------------------------------------------------------------------------|
| <i>Pemphis acidula</i> J.R. & G. Forst.                | • | • |   |                                                                                                                                                                                                                                                                                                                                                                                                                                                                                                                                                        |
| MALVACEAE                                              | • |   |   |                                                                                                                                                                                                                                                                                                                                                                                                                                                                                                                                                        |
| <i>Hibiscus tiliaceus</i> L.                           |   |   |   |                                                                                                                                                                                                                                                                                                                                                                                                                                                                                                                                                        |
| <i>Kleinhovia hospita</i> L.                           |   |   | • | <i>Antiviral</i> : (9 <i>R</i> ,10 <i>R</i> , 23 <i>R</i> )-21,23:23,27-diepoxy cycloartan-1,24-diene-3,27-dione ( <b>49</b> ) and (9 <i>R</i> ,10 <i>R</i> ,21 <i>S</i> ,23 <i>R</i> )-21/23,23/27-diepoxy-21-methoxycycloartan-1,24-diene-3,27-dione ( <b>50</b> ), HIV, IC <sub>50</sub> : 0.8 and 2.4 μM [156].                                                                                                                                                                                                                                    |
| <i>Malachra capitata</i> (L.) L.                       | • | • | • |                                                                                                                                                                                                                                                                                                                                                                                                                                                                                                                                                        |
| <i>Thespesia populnea</i> (L.) Soland. ex Correa       |   |   |   | <i>Antibacterial</i> : Populene C ( <b>42</b> ), populene D ( <b>43</b> ), mansonone D ( <b>44</b> ), mansonone E ( <b>45</b> ), 7-hydroxycadalene ( <b>46</b> ), gossypol ( <b>47</b> ), and (+) 6,6'-methoxygossypol ( <b>48</b> ), <i>B. cereus</i> MIC: 4.6, 4.6, 2.3, 4.6, 0.5, 1.1, and 2.3 μg/mL, respectively. Gossypol ( <b>47</b> ) and (+) 6,6'-methoxygossypol ( <b>48</b> ), <i>S. aureus</i> , MIC: 1.1 and 4.6 μg/mL, respectively. (+) 6,6'-Methoxygossypol ( <b>48</b> ), <i>E. faecalis</i> MIC: 1.1 μg/mL [152].                    |
| MELIACEAE                                              | • | • | • |                                                                                                                                                                                                                                                                                                                                                                                                                                                                                                                                                        |
| <i>Aglaia cucullata</i> Pellegr.                       |   |   |   |                                                                                                                                                                                                                                                                                                                                                                                                                                                                                                                                                        |
| <i>Xylocarpus granatum</i> J. Koenig                   |   |   |   | <i>Antifungal</i> : 3-(1-Hydroxyethyl)-2,2-dimethyl-4-butyrolactone ( <b>59</b> ), 20 μg/mL, <i>B. graminis</i> by 67.4% [171].<br><i>Antiviral</i> : Sundarbanxylogranin B ( <b>55</b> ), HIV-1, IC <sub>50</sub> : 23.1 μM [167].                                                                                                                                                                                                                                                                                                                    |
| <i>Xylocarpus moluccensis</i> (Lam.) M. Roem.          |   |   |   | <i>Antiviral</i> : Thaixylomolin I ( <b>56</b> ), K ( <b>57</b> ), IVA, IC <sub>50</sub> : 77.1, 113.5 μM [168].<br>Krishnolide A ( <b>58</b> ), 20 μM, HIV-1, 79.7% [169].                                                                                                                                                                                                                                                                                                                                                                            |
| MORACEAE                                               |   |   |   |                                                                                                                                                                                                                                                                                                                                                                                                                                                                                                                                                        |
| <i>Ficus microcarpa</i> L.f.                           |   |   |   | <i>Antiviral</i> : (+)(2 <i>R</i> ,3 <i>S</i> ) afzelechin ( <b>36</b> ) and (-)(2 <i>R</i> ,3 <i>R</i> ) epiafzelechin ( <b>37</b> ), HSV-1, IC <sub>50</sub> : 490 and 550 μg/mL [122].                                                                                                                                                                                                                                                                                                                                                              |
| MYOPORACEAE                                            |   |   |   |                                                                                                                                                                                                                                                                                                                                                                                                                                                                                                                                                        |
| <i>Myoporum bontiodoides</i> (Siebold & Zucc.) A. Gray | • | • |   | <i>Antibacterial</i> : Myoporamine A ( <b>82</b> ), myoporamine B ( <b>83</b> ), (-)-epingaione ( <b>84</b> ), and (-)-dehydroepingaione ( <b>85</b> ), MRSA, MIC: 6.2, 6.2, 25, and 25 μg/mL, respectively [250].<br><i>Antifungal</i> : (-)-Epingaione ( <b>84</b> ), <i>F. oxysporum</i> , <i>Pestalotia mangiferae</i> (EC <sub>50</sub> : 77 mg/L), <i>T. paradoxa</i> , <i>C. musae</i> , <i>A. alternata</i> , <i>M. sentina</i> , and <i>S. fawcettii</i> [249]. homomonoterpene, <i>P. capsici</i> , IC <sub>50</sub> below 63.5 μg/mL [251]. |
| MYRTACEAE                                              | • | • |   |                                                                                                                                                                                                                                                                                                                                                                                                                                                                                                                                                        |
| <i>Melaleuca cajuputi</i> Roxb.                        |   |   |   |                                                                                                                                                                                                                                                                                                                                                                                                                                                                                                                                                        |
| <i>Melaleuca quinquenervia</i> (Cav.) S.T. Blake       | • | • | • |                                                                                                                                                                                                                                                                                                                                                                                                                                                                                                                                                        |
|                                                        | • |   |   |                                                                                                                                                                                                                                                                                                                                                                                                                                                                                                                                                        |

|                                                  |   |   |   |                                                                                                                                                                                                                                                                                                                                                                                                                                                                                                                                                                                                           |
|--------------------------------------------------|---|---|---|-----------------------------------------------------------------------------------------------------------------------------------------------------------------------------------------------------------------------------------------------------------------------------------------------------------------------------------------------------------------------------------------------------------------------------------------------------------------------------------------------------------------------------------------------------------------------------------------------------------|
| OLACAEAE                                         |   |   |   |                                                                                                                                                                                                                                                                                                                                                                                                                                                                                                                                                                                                           |
| <i>Olax scandens</i> Roxb.                       | • | • |   |                                                                                                                                                                                                                                                                                                                                                                                                                                                                                                                                                                                                           |
| <i>Ximenia americana</i> L.                      | • | • |   |                                                                                                                                                                                                                                                                                                                                                                                                                                                                                                                                                                                                           |
| PLUMBAGINACEAE                                   |   |   |   |                                                                                                                                                                                                                                                                                                                                                                                                                                                                                                                                                                                                           |
| <b><i>Aegialitis rotundifolia</i> Roxb.</b>      |   |   |   |                                                                                                                                                                                                                                                                                                                                                                                                                                                                                                                                                                                                           |
| <i>Limonium tetragonum</i> (Thunb.) Bullock      | • |   | • |                                                                                                                                                                                                                                                                                                                                                                                                                                                                                                                                                                                                           |
|                                                  | • |   | • |                                                                                                                                                                                                                                                                                                                                                                                                                                                                                                                                                                                                           |
| RHIZOPHORACEAE                                   |   |   |   |                                                                                                                                                                                                                                                                                                                                                                                                                                                                                                                                                                                                           |
| <b><i>Bruguiera cylindrica</i> (L.) Bl.</b>      | • |   |   |                                                                                                                                                                                                                                                                                                                                                                                                                                                                                                                                                                                                           |
|                                                  | • |   | • |                                                                                                                                                                                                                                                                                                                                                                                                                                                                                                                                                                                                           |
| <b><i>Bruguiera gymnorhiza</i> (L.) Savigny</b>  |   |   | • |                                                                                                                                                                                                                                                                                                                                                                                                                                                                                                                                                                                                           |
| <b><i>Bruguiera sexangula</i> (Lour.) Poir.</b>  |   |   |   |                                                                                                                                                                                                                                                                                                                                                                                                                                                                                                                                                                                                           |
| <i>Carallia brachiata</i> (Lour.) Merr.          | • |   |   |                                                                                                                                                                                                                                                                                                                                                                                                                                                                                                                                                                                                           |
|                                                  | • |   |   |                                                                                                                                                                                                                                                                                                                                                                                                                                                                                                                                                                                                           |
| <b><i>Ceriops decandra</i> (Griff.) Ding Hou</b> |   | • | • | <i>Antibacterial:</i> 16-Hydroxypimar-8(14)-en-15-one ( <b>22</b> ), <i>B. cereus</i> , <i>S. aureus</i> , <i>M. kristinae</i> , <i>S. pyogenes</i> , and <i>S. pooni</i> , MIC:100, 100, 100, 500, and 250 µg/mL, respectively [80].                                                                                                                                                                                                                                                                                                                                                                     |
| <b><i>Ceriops tagal</i> (Perr.) C.B. Rob.</b>    |   |   |   | <i>Antibacterial:</i> 2,6-Dimethoxy- <i>p</i> -benzoquinone ( <b>20</b> ) [78]. Gallic acid ( <b>21</b> ), <i>K. pneumoniae</i> , <i>mirabilis</i> , <i>Proteus vulgaris</i> , <i>S. marcesens</i> , MIC 250, 500, 125, and 250 µg/mL, respectively [86]; <i>S. aureus</i> , MIC: 64 µg/mL, respectively, MRSA, MIC: 128 µg/mL [87]. <i>S. aureus</i> , <i>S. epidermidis</i> , <i>M. luteus</i> , <i>E. coli</i> , <i>B. subtilis</i> , MIC/MBC 600/2500, 300/600, 300/600, 2500/>2500, and 600/600 µg/mL respectively [79] <i>S. aureus</i> , MIC: 232 µg/mL, <i>B. subtilis</i> , MIC: 464 µg/mL [88]. |
| <i>Kandelia candel</i> (L.) Druce                |   |   |   | <i>Antifungal:</i> 2,6-Dimethoxy- <i>p</i> -benzoquinone ( <b>20</b> ) [78]. Gallic acid ( <b>21</b> ), <i>C. albicans</i> [81] and MIC/MBC 1200/2500 µg/mL [79].                                                                                                                                                                                                                                                                                                                                                                                                                                         |
| <b><i>Rhizophora apiculata</i> Bl.</b>           |   |   |   | <i>Antiviral:</i> Gallic acid ( <b>21</b> ), EV- 71, IC <sub>50</sub> : 0.7 µg/mL; HRV-3, 100 µg/mL, 58 %, [83]; HCV, IC <sub>50</sub> : 15.9 µg/mL [87], HSV-1, IC <sub>50</sub> : 20 µg/mL [91]; HCV, IC <sub>50</sub> : 24.3 µg/mL [91]; Influenza A, IC <sub>50</sub> : 2.6 µg/mL [89]; HCoV, IC <sub>50</sub> : 71.4 µM [90,93], WSSV [84].                                                                                                                                                                                                                                                          |
|                                                  | • |   |   |                                                                                                                                                                                                                                                                                                                                                                                                                                                                                                                                                                                                           |
| <i>Rhizophora stylosa</i> Griff.                 |   |   |   |                                                                                                                                                                                                                                                                                                                                                                                                                                                                                                                                                                                                           |

|                                                     |   |   |   |                                                                                                                                                                                                                                                                                                                                                                                                                                                                                                                                            |
|-----------------------------------------------------|---|---|---|--------------------------------------------------------------------------------------------------------------------------------------------------------------------------------------------------------------------------------------------------------------------------------------------------------------------------------------------------------------------------------------------------------------------------------------------------------------------------------------------------------------------------------------------|
| RUBIACEAE<br><i>Gardenia lucida</i> Roxb.           | • | • |   | <p><i>Antifungal</i>: 5,4'-Dihydroxy-6,7,8,-trimethoxyflavone (<b>70</b>), <i>F. solani</i>, <i>A. parasiticus</i> and <i>C. tropicalis</i> [91]</p> <p><i>Antiviral</i>: 5,4'-Dihydroxy-6,7,8,-trimethoxyflavone (<b>70</b>), <i>HIV</i>, <math>IC_{50}</math>: 17.4 <math>\mu</math>M [236].</p>                                                                                                                                                                                                                                         |
| <i>Guettarda speciosa</i> L.                        | • |   |   | <p><i>Antibacterial</i>: Indole alkaloids, <i>M. tuberculosis</i> [230].</p> <p><i>Antiviral</i>: Loganic acid (<b>67</b>), <math>IC_{50}</math>: 20 <math>\mu</math>g/mL, HCV [228]. 4,5-di-O-caffeoylquinic acid (<b>69</b>) <i>HIV</i>-1, <i>HIV</i>-2, <i>SIM</i>, and <i>HSV</i>, <math>EC_{50}</math>: 0.6, 8, 2, and 0.1 <math>\mu</math>g/mL, respectively [81,229].</p>                                                                                                                                                           |
| <i>Hydnophytum formicarum</i> Jack                  |   |   |   | <p><i>Antibacterial</i> Butein (<b>71</b>), <i>M. tuberculosis</i>, MIC: 12.5 <math>\mu</math>g/mL [237].</p> <p><i>Antiviral</i>: Butein (<b>71</b>), 50 <math>\mu</math>g/mL, <i>HIV</i> protease by 57.9% [88].</p>                                                                                                                                                                                                                                                                                                                     |
| <i>Morinda citrifolia</i> L.                        |   |   |   | <p><i>Antibacterial</i>: Damnacanthal (<b>72</b>), <i>P. aeruginosa</i>, 10 <math>\mu</math>g/disc [220]. 1,3-Dihydroxy-5-methoxy-2,6-bismethoxymethyl-9,10-anthraquinone, <i>S. aureus</i>, MIC: 24 <math>\mu</math>M [234]. (<i>E</i>)-phytol (<b>73</b>), <i>M. tuberculosis</i>, MIC: 32 <math>\mu</math>g/mL [232]. Damnacanthal (<b>70</b>), <i>M. tuberculosis</i>, MIC: 13 <math>\mu</math>g/mL [233,93].</p> <p><i>Antifungal</i>: Damnacanthal (<b>72</b>), <i>A. ochraceus</i>, <i>A. niger</i>, <i>C. lipolytica</i> [91].</p> |
| <i>Myrmecodia tuberosa</i> Jack                     | • | • | • | <p><i>Antiviral</i>: 1,3-Dihydroxy-5-methoxy-2,6-bismethoxymethyl-9,10-anthraquinone (<b>71</b>), Influenza virus A H1N1 and H3N2, <math>IC_{50}</math>: 10.5 and 11.5 <math>\mu</math>M, respectively [234]. 1,3-Dihydroxy-5-methoxy-6-methoxymethyl-2-methyl-9,10-anthraquinone, IVA H1N1, <math>IC_{50}</math>: 66.1 <math>\mu</math>M [234]. Asperuloside (<b>68</b>), <i>HSV</i>, <math>IC_{50}</math>: 111.3 <math>\mu</math>g/mL [234] and EBV [232].</p>                                                                           |
| <i>Psychotria serpens</i> L.                        | • |   |   | <p><i>Antibacterial</i>: Iridoids, <i>S. aureus</i>, MIC: 100 <math>\mu</math>g/mL [231].</p>                                                                                                                                                                                                                                                                                                                                                                                                                                              |
| <i>Scyphiphora hydrophyllacea</i> C.F. Gaertn.      | • | • |   |                                                                                                                                                                                                                                                                                                                                                                                                                                                                                                                                            |
| RUTACEAE<br><i>Acronychia pedunculata</i> (L.) Miq. |   | • |   | <p><i>Antibacterial</i>: Acrovestone (<b>60</b>) [180].</p>                                                                                                                                                                                                                                                                                                                                                                                                                                                                                |
| <i>Atalantia monophylla</i> DC.                     |   |   |   |                                                                                                                                                                                                                                                                                                                                                                                                                                                                                                                                            |

|                                              |   |   |   |                                                                                                                                                                                                                                                                                                                                                                                                                                        |
|----------------------------------------------|---|---|---|----------------------------------------------------------------------------------------------------------------------------------------------------------------------------------------------------------------------------------------------------------------------------------------------------------------------------------------------------------------------------------------------------------------------------------------|
| <i>Linnocitrus littoralis</i> (Miq.) Swingle | • | • |   |                                                                                                                                                                                                                                                                                                                                                                                                                                        |
| SALVADORACEAE                                | • | • |   |                                                                                                                                                                                                                                                                                                                                                                                                                                        |
| <i>Azima sarmentosa</i> (Bl.) B. & H.        | • | • | • |                                                                                                                                                                                                                                                                                                                                                                                                                                        |
| <i>Azima tetracantha</i> Lam.                |   |   |   |                                                                                                                                                                                                                                                                                                                                                                                                                                        |
| SAPINDACEAE                                  | • | • |   |                                                                                                                                                                                                                                                                                                                                                                                                                                        |
| <i>Allophylus cobbe</i> (L.) Raeusch         |   |   |   |                                                                                                                                                                                                                                                                                                                                                                                                                                        |
| <i>Harpullia arborea</i> (Blanco) Radlk      | • | • |   |                                                                                                                                                                                                                                                                                                                                                                                                                                        |
| SIMAROUBACEAE                                | • | • |   |                                                                                                                                                                                                                                                                                                                                                                                                                                        |
| <i>Quassia indica</i> (Gaertn.) Nooteboom    |   |   |   |                                                                                                                                                                                                                                                                                                                                                                                                                                        |
| SOLANACEAE                                   | • | • |   |                                                                                                                                                                                                                                                                                                                                                                                                                                        |
| <i>Solanum viride</i> R.Br.                  |   |   |   |                                                                                                                                                                                                                                                                                                                                                                                                                                        |
| SONNERATIACEAE                               |   |   |   |                                                                                                                                                                                                                                                                                                                                                                                                                                        |
| <i>Sonneratia apetala</i> Buch.-Ham.         | • |   |   |                                                                                                                                                                                                                                                                                                                                                                                                                                        |
| <i>Sonneratia griffithii</i> Kurtz.          |   |   |   |                                                                                                                                                                                                                                                                                                                                                                                                                                        |
| <i>Sonneratia ovata</i> Back.                | • |   |   | Antibacterial: 3 $\beta$ -Hydroxy-lup-9(11),12-diene, 28-oic acid ( <b>39</b> ) ,<br>lupeol ( <b>40</b> ), lupan-3 $\beta$ -ol ( <b>39</b> ), <i>S. aureus</i> , MIC: 32.2, 15.6, and 33.1<br>$\mu$ g/mL, respectively. 3 $\beta$ -Hydroxy-lup-9(11),12-diene, 28-oic acid ( <b>39</b> )<br>, lupeol ( <b>40</b> ), lupan-3 $\beta$ -ol ( <b>41</b> ), <i>S. mutans</i> , MIC: 35.6, 40.6, and 55.2<br>$\mu$ g/mL, respectively [146]. |
| STERCULIACEAE                                |   |   |   |                                                                                                                                                                                                                                                                                                                                                                                                                                        |
| <i>Heritiera littoralis</i> Aiton            | • |   |   | Antibacterial: Afzelin ( <b>51</b> ), <i>S. aureus</i> , <i>P. aeruginosa</i> , <i>S. typhi</i> ; MIC: 8, 16,<br>and 2 $\mu$ g/mL, respectively [159]. Astilbin ( <b>54</b> ), <i>S. sobrinus</i> MIC/MBC:<br>225/900 $\mu$ g/mL [161].                                                                                                                                                                                                |
| .                                            | • |   |   | Antifungal: Afzelin ( <b>51</b> ), <i>C. parapsilosis</i> , <i>C. neoformans</i> , MIC: 16 and 4<br>$\mu$ g/mL, respectively [159]. Taraxerol ( <b>52</b> ), <i>T. mentagrophytes</i> and <i>T.</i><br><i>rubrum</i> , MIC at 12.5 $\mu$ g/mL [55].                                                                                                                                                                                    |
|                                              | • | • |   |                                                                                                                                                                                                                                                                                                                                                                                                                                        |



|                                                                                                                                                                                                        |   |  |                                                                                                                                                                                                                                                                                                                                                                                                                                                                                                                                                                                                                                                                                                                                                                                                                                                                                                                                                                                                                                                                                                                                                                                                        |
|--------------------------------------------------------------------------------------------------------------------------------------------------------------------------------------------------------|---|--|--------------------------------------------------------------------------------------------------------------------------------------------------------------------------------------------------------------------------------------------------------------------------------------------------------------------------------------------------------------------------------------------------------------------------------------------------------------------------------------------------------------------------------------------------------------------------------------------------------------------------------------------------------------------------------------------------------------------------------------------------------------------------------------------------------------------------------------------------------------------------------------------------------------------------------------------------------------------------------------------------------------------------------------------------------------------------------------------------------------------------------------------------------------------------------------------------------|
| <p><b><i>Heritiera fomes</i> Buch. Ham.</b></p> <p>VERBENACEAE</p> <p><i>Premna odorata</i> Blanco</p> <p><i>Premna integrifolia</i> L.</p> <p>VITACEAE</p> <p><i>Cayratia trifolia</i> (L.) Domin</p> | • |  | <p><i>Antiviral</i>: Afzelin (<b>51</b>), 50 µg/mL, HSV-1 by 72.5% [160]. Friedelin (<b>53</b>), HIPV-3, IC<sub>50</sub>: 14 × 10<sup>-5</sup> M [162], at 5 µg/mL HCoV by 132.4 % [163].</p> <p><i>Antibacterial</i>: 1-Heneicosyl formate (<b>86</b>), <i>M. tuberculosis</i>, MIC: 8 µg/mL [252].</p> <p><i>Antibacterial</i>: ε-Viniferin (<b>12</b>) (200 µL/well from 1 mg/mL solution), <i>E. coli</i> and <i>S. aureus</i>, 11 and 7 mm, respectively [56]. ε-Viniferin (<b>12</b>), MRSA, MIC: 25 µg/mL [57], <i>S. mutans</i> and <i>S. sanguis</i>, MIC/MBC: 25/50 and 50/50 µg/mL, respectively [54,55]. ε-Viniferin (<b>12</b>) <i>S. aureus</i> and <i>P. aeruginosa</i>, MIC: 512 and 256 µg/mL, respectively [59]. Resveratrol (<b>14</b>), <i>S. mutans</i> and <i>S. sanguis</i>, MIC/MBC: 50/50 and 50/100 µg/mL, respectively, <i>S. aureus</i>, MIC: 512 µg/mL [54,55].</p> <p><i>Antifungal</i>: Resveratrol (<b>14</b>), <i>B. cinerea</i>, conidia IC<sub>50</sub>: 90 µg/mL [58].</p> <p><i>Antiviral</i>: ε-Viniferin (<b>12</b>), HCV, EC<sub>50</sub>: 0.1 µM [54]. IVA, IC<sub>50</sub>: 88.5 µg/mL [53]. Piceid (<b>13</b>), IVA, IC<sub>50</sub>: 110.7 µg/mL [53].</p> |
|--------------------------------------------------------------------------------------------------------------------------------------------------------------------------------------------------------|---|--|--------------------------------------------------------------------------------------------------------------------------------------------------------------------------------------------------------------------------------------------------------------------------------------------------------------------------------------------------------------------------------------------------------------------------------------------------------------------------------------------------------------------------------------------------------------------------------------------------------------------------------------------------------------------------------------------------------------------------------------------------------------------------------------------------------------------------------------------------------------------------------------------------------------------------------------------------------------------------------------------------------------------------------------------------------------------------------------------------------------------------------------------------------------------------------------------------------|

Bold: true mangrove plants [3]

•: Activity of extract(s) reported in the literature

IZD: Inhibition zone diameter
