# Supplementary material for: Antimicrobial Secondary Metabolites from the Mangrove Plants of Asia and the Pacific
Source: MDPI journal article supplement (doi:10.3390/md20100643), 2022-10-15
Supplement: s1 [file s1]

Table S1. Plants from the Mangroves, Tidal Rivers, and the Seashores of Asia and the Pacific

| FAMILY<br>Genus, species<br>(synonym)                                                                                                                                        | Distribution                                                 | Medicinal use (country) ref. |
|------------------------------------------------------------------------------------------------------------------------------------------------------------------------------|--------------------------------------------------------------|------------------------------|
| SUBCLASS LYCOPODIIDAE                                                                                                                                                        |                                                              |                              |
| LYCOPODIACEAE<br><i>Lycopodium carinatum</i> Desv. ex Poir<br>( <i>Phlegmariurus carinatus</i> (Desv. ex Poir.) Ching).                                                      | India, Bangladesh, Southeast Asia, China, Papua, Pacific     |                              |
| SUBCLASS POLYPODIIDAE                                                                                                                                                        |                                                              |                              |
| ASPLENIACEAE<br><i>Asplenium macrophyllum</i> Sw.<br>( <i>Asplenium capuronii</i> Tardieu)                                                                                   | India, Bangladesh, Southeast Asia, Papua, Australia, Pacific |                              |
| BLECHNACEAE<br><i>Stenochlaena palustris</i> (Burm. f.) Bedd<br>( <i>Polypodium palustre</i> Burm. f.,<br><i>Pteris scandens</i> (Willd.) Roxb.)                             | India, Bangladesh, Southeast Asia, Papua, Australia          |                              |
| DAVALLIACEAE<br><i>Davallia denticulata</i> (Burm. f.) Mett. ex Kuhn( <i>Adiantum denticulatum</i> Burm. f.)                                                                 | India, Bangladesh, Southeast Asia, Papua, Australia          |                              |
| <i>Davallia parvula</i> Wall. ex Hook. & Grev.<br>( <i>Humata parvula</i> (Wall. ex Hook. & Grev.) Mett.)                                                                    | Malaysia, Indonesia, Papua                                   |                              |
| <i>Davallia angustata</i> Wall. ex Hook. & Grev.<br>( <i>Humata angustata</i> (Wall. ex Hook. & Grev.) J. Sm., <i>Pachypleura angustata</i> (Wall. ex Hook. & Grev.) J. Sm.) | Thailand, Vietnam, Malaysia, Indonesia                       |                              |
| DRYOPTERIDACEAE<br><i>Elaphoglossum amblyphyllum</i> P.R. Bell.                                                                                                              | Malaysia, Indonesia                                          |                              |
| HYMENOPHYLLACEAE<br><i>Hymenophyllum holochilum</i> (Bosch) C. Chr.( <i>Didymoglossum holochilum</i> Bosch)                                                                  | India, Bangladesh, Southeast Asia, Papua, Australia, Pacific |                              |
| NEPHROLEPIDACEAE<br><i>Nephrolepis acutifolia</i> (Desv.) Christ                                                                                                             | Southeast Asia, Papua, Australia, Pacific                    | Diarrhoea (Indonesia) [264]  |
| <i>Nephrolepis biserrata</i> (Sw.) Schott ( <i>Aspidium biserratum</i> Sw.)                                                                                                  | India, Bangladesh, Southeast Asia, Papua, Australia, Pacific | Wounds (Indonesia) [264]     |

|                                                                                                                                                                                                                             |                                                                    |                                  |
|-----------------------------------------------------------------------------------------------------------------------------------------------------------------------------------------------------------------------------|--------------------------------------------------------------------|----------------------------------|
| <p><i>Nephrolepis falcata</i> (Cav.) C. Chr.<br/>(<i>Tectaria falcata</i> Cav.)</p>                                                                                                                                         | the Philippines                                                    |                                  |
| <p>POLYPODIACEAE</p> <p><i>Ctenopteris moultoni</i> (Copel.) C. Christ. &amp; Tardieu<br/>(<i>Polypodium moultonii</i> Copel.,<br/><i>Ctenopterella blechnoides</i> (Grev.) Parris)</p>                                     | Thailand, Malaysia, Indonesia                                      |                                  |
| <p><i>Drynaria rigidula</i> (Sw.) Bedd.<br/>(<i>Polypodium rigidulum</i> Sw.)</p>                                                                                                                                           | Malaysia, Thailand, Indonesia, Papua                               | Gonorrhoea (Indonesia) [279]     |
| <p><i>Drynaria quercifolia</i> (L.) J. Sm.<br/>(<i>Polypodium quercifolium</i> L.)</p>                                                                                                                                      | India, Bangladesh, Malaysia, Thailand, Indonesia, Papua, Australia | Cough (India) [293]              |
| <p><i>Drynaria sparsisora</i> (Desv.) T. Moore<br/>(<i>Polypodium sparsisorum</i> Desv.)</p>                                                                                                                                | Malaysia, Thailand, Indonesia, Papua, Australia                    |                                  |
| <p><i>Drymoglossum piloselloides</i> (L.) Presl.<br/>(<i>Pteris piloselloides</i> L., <i>Pyrrosia piloselloides</i> (L.) M.G. Price)</p>                                                                                    | India, Bangladesh, Southeast Asia, China, Japan, Papua             | Smallpox (the Philippines) [278] |
| <p><i>Loxogramme involuta</i> (D. Don) C. Presl<br/>(<i>Grammitis involuta</i> D. Don,<br/><i>Gymnogramma involuta</i> (D. Don) Hook.)</p>                                                                                  | Bangladesh, Myanmar, Thailand, Cambodia, Vietnam, China            |                                  |
| <p><i>Microsorium punctatum</i> (L.) Copel.<br/>(<i>Acrostichum punctatum</i> L.)</p>                                                                                                                                       | India, Bangladesh, Southeast Asia, Papua, Australia                |                                  |
| <p><i>Myrmecophila sinuosa</i> (Hook.) Nakai ex H. Itô<br/>(<i>Lecanopteris sinuosa</i> (Wall. ex Hook.) Copel.,<br/><i>Polypodium sinuosum</i> Hook.)</p>                                                                  | Southeast Asia, Papua, Australia                                   |                                  |
| <p><i>Photinopteris speciosa</i> (Bl.) C. Presl<br/>(<i>Drynaria speciosa</i> (Bl.) Christenh.,<br/><i>Photinopteris acuminata</i> (Willd.) C.V. Morton)</p>                                                                | Southeast Asia, China                                              |                                  |
| <p><i>Phymatosorus scolopendria</i> (Burm. f.) Pic. Serm.<br/><br/>(<i>Microsorium scolopendria</i> (Burm.f.) Copel.,<br/><i>Phymatodes scolopendria</i> (Burm. f.) Ching,<br/><i>Polypodium scolopendria</i> Burm. f.)</p> | Southeast Asia, Papua, Australia, Pacific                          | Wounds (Samoa) [278]             |
| <p><i>Platyserium coronarium</i> (O.F. Müll.) Desv.<br/>(<i>Osmunda coronaria</i> O.F. Müll.)</p>                                                                                                                           | Southeast Asia                                                     |                                  |

|                                                                                                                                                                                                                                                                                                                                                                                                                                                                                                                                      |                                                                                                                                                                                                                                                                         |                                                                    |
|--------------------------------------------------------------------------------------------------------------------------------------------------------------------------------------------------------------------------------------------------------------------------------------------------------------------------------------------------------------------------------------------------------------------------------------------------------------------------------------------------------------------------------------|-------------------------------------------------------------------------------------------------------------------------------------------------------------------------------------------------------------------------------------------------------------------------|--------------------------------------------------------------------|
| <i>Pyrrosia lanceolata</i> (L.) Farw.<br><i>(Acrostichum lanceolatum L.)</i><br><br><i>Pyrrosia longifolia</i> (Burm. f.) C.V. Morton<br><i>(Acrostichum longifolium Burm. f.)</i><br><br>PTERIDACEAE<br><b><i>Acrostichum aureum</i> L.</b><br><i>(Acrostichum inaequale Willd.,</i><br><i>Chrysodium aureum (L.) Mett.)</i><br><br><b><i>Acrostichum speciosum</i> Willd.</b><br><i>(Acrostichum aureum var.speciosum (Willd.) T. Moore)</i><br><br><i>Vittaria elongata</i> Sw.<br><i>(Haplopteris elongata (Sw.) E.H. Crane)</i> | Southeast Asia, Papua, Australia, Pacific<br><br>Southeast Asia, Papua, Australia Pacific<br><br>India, Bangladesh, Southeast Asia, Papua, Australia, Pacific<br><br>Southeast Asia, Papua, Australia<br><br>India, Bangladesh, Southeast Asia, China, Papua, Australia | <br><br><br><br><br><br><br><br><br><br>Fever (Fiji) [292]         |
| SUBCLASS CYCADIIDAE<br><br>CYCADACEAE<br><i>Cycas rumphii</i> Miq.                                                                                                                                                                                                                                                                                                                                                                                                                                                                   | Indonesia, Papua, Australia                                                                                                                                                                                                                                             | Wounds (Indonesia) [277]                                           |
| PODOCARPACEAE<br><br><i>Podocarpus polystachyus</i> R. Br. ex Endl.<br><i>(Margbensonia polystachyus (R. Br. ex Endl.) A.E Bobrov &amp; Melikyan,</i><br><i>Nageia polystachia (R. Br. ex Endl.) Kuntze)</i>                                                                                                                                                                                                                                                                                                                         | Thailand, Malaysia, Indonesia, the Philippines                                                                                                                                                                                                                          |                                                                    |
| SUBCLASS MAGNOLIIDAE-MONOCOTS<br><br>ARACEAE<br><i>Aglaonema griffithii</i> Schott<br><i>(Aglaodorum griffithii (Schott) Schott)</i><br><br><i>Cryptocoryne ciliata</i> (Roxb.) Fisch. ex Schott<br><i>(Ambrosina ciliata Roxb.)</i><br><br><i>Lasia spinosa</i> (L.) Thwaites<br><i>(Dracontium spinosum L.)</i><br><br>ARECACEAE<br><i>Calamus erinaceus</i> (Becc.) J. Dransf.<br><i>(Daemonorops erinacea Becc.)</i><br><br><i>Oncosperma tigillarum</i> (Jack) Ridl.                                                            | Thailand, Malaysia, Vietnam, Indonesia<br><br>India, Bangladesh, Southeast Asia, Papua<br><br>India, Bangladesh, Southeast Asia, China, Papua<br><br>Southeast Asia<br><br>Southeast Asia                                                                               | <br><br><br><br><br><br><br><br><br><br>Tuberculosis (China) [280] |

|                                                                                                           |                                                              |  |
|-----------------------------------------------------------------------------------------------------------|--------------------------------------------------------------|--|
| ( <i>Areca tigillaria</i> Jack, <i>Oncosperma filamentosa</i> Bl.)                                        |                                                              |  |
| <i>Phoenix paludosa</i> Roxb.                                                                             | India, Bangladesh, Southeast Asia                            |  |
| <i>Saribus rotundifolius</i> (Lam.) Bl.<br>( <i>Corypha rotundifolia</i> Lam.)                            | Indonesia, Papua                                             |  |
| CYPERACEAE                                                                                                |                                                              |  |
| <i>Baumea juncea</i> (R. Br.) Palla<br>( <i>Cladium junceum</i> R. Br.)                                   | Australia, New Caledonia                                     |  |
| <i>Cyperus elatus</i> L.<br>( <i>Cyperus distans</i> L.f.)                                                | India, Bangladesh, Southeast Asia, Papua                     |  |
| <i>Cyperus javanicus</i> Hoult.<br>( <i>Cyperus pennatus</i> Lam.)                                        | India, Bangladesh, Southeast Asia, Papua, Pacific            |  |
| <i>Cyperus malaccensis</i> Lam.<br>( <i>Cyperus fortunei</i> Steud.)                                      | India, Bangladesh, Southeast Asia, Papua                     |  |
| <i>Cyperus stolonifer</i> Retz.<br>( <i>Cyperus tuberosus</i> Bojer)                                      | India, Bangladesh, Southeast Asia, Papua, Australia, Pacific |  |
| <i>Cyperus tagetum</i> Roxb.                                                                              | India                                                        |  |
| <i>Cyperus scariosus</i> R. Br.                                                                           | Papua, Australia                                             |  |
| <i>Eleocharis dulcis</i> (Burm. f.) Trin. ex Hensch.<br>( <i>Scirpus spiralis</i> Rottb.)                 | India, Bangladesh, Southeast Asia, Papua, Australia, Pacific |  |
| <i>Fimbristylis cymosa</i> R. Br.<br>( <i>Fimbristylis spathacea</i> Roth)                                | India, Bangladesh, Southeast Asia, Papua, Australia          |  |
| <i>Fimbristylis ferruginea</i> (L.) Vahl<br>( <i>Scirpus debilis</i> Lam., <i>Scirpus ferrugineus</i> L.) | India, Bangladesh, Southeast Asia, Papua, Australia, Pacific |  |
| <i>Fimbristylis littoralis</i> Gaudich.                                                                   | India, Bangladesh, Southeast Asia, Papua, Australia, Pacific |  |
| <i>Fimbristylis polytrichoides</i> (Retz.) R.Br.<br>( <i>Scirpus polytrichoides</i> Retz.)                | India, Bangladesh, Southeast Asia, Papua, Australia          |  |
| <i>Fimbristylis subspicata</i> Nees                                                                       | Japan, Vietnam                                               |  |
| <i>Rhynchospora corymbosa</i> (L.) Britton                                                                | India, Bangladesh, Southeast Asia, Papua, Australia          |  |

|                                                                                                                                                                                                                                  |                                                                            |                               |
|----------------------------------------------------------------------------------------------------------------------------------------------------------------------------------------------------------------------------------|----------------------------------------------------------------------------|-------------------------------|
| ( <i>Scirpus corymbosus</i> L.)                                                                                                                                                                                                  |                                                                            |                               |
| <i>Scirpus grossus</i> L.f.<br>( <i>Actinoscirpus grossus</i> (L. f.) Goetgh. & D.A. Simpson)                                                                                                                                    | India, Bangladesh, Southeast Asia, Papua, Australia, Pacific               | Leucorrhea (Bangladesh) [284] |
| <i>Scirpus kimsonensis</i> N.K. Khoi                                                                                                                                                                                             | Vietnam                                                                    |                               |
| FLAGELLARIACEAE                                                                                                                                                                                                                  |                                                                            |                               |
| <i>Flagellaria indica</i> L.<br>( <i>Flagellaria minor</i> Bl., <i>Flagellaria philippinensis</i> Elmer)                                                                                                                         | India, Bangladesh, Southeast Asia, Papua, Australia, Pacific               |                               |
| JUNCAGINACEAE                                                                                                                                                                                                                    |                                                                            |                               |
| <i>Triglochin striata</i> Ruiz & Pavon<br>( <i>Triglochin decipiens</i> R. Br., <i>Triglochin decipiens</i> R. Br.,<br><i>Triglochin montevidensis</i> Spreng.)                                                                  | Australia                                                                  |                               |
| ORCHIDACEAE                                                                                                                                                                                                                      |                                                                            |                               |
| <i>Aerides odoratum</i> Reinw. ex Bl.                                                                                                                                                                                            | Southeast Asia, China                                                      | Pneumonia (Bangladesh) [283]  |
| <i>Bulbophyllum xylocarpi</i> J.J. Sm.                                                                                                                                                                                           | Southeast Asia, China                                                      |                               |
| <i>Cymbidium finlaysonianum</i> Wall. ex Lindl.<br>( <i>Cymbidium aloifolium</i> (L.) Sw., <i>Cymbidium pendulum</i> (Roxb.)<br>Sw., <i>Cymbidium pendulum</i> var. <i>brevilabre</i> Lindl., <i>Cymbidium tricolor</i><br>Miq.) | Southeast Asia                                                             |                               |
| <i>Dendrobium aloefolium</i> (Bl.) Rchb.f.                                                                                                                                                                                       | Southeast Asia, Papua                                                      |                               |
| <i>Dendrobium moschatum</i> (Buch.-Ham.) Sw.<br>( <i>Epidendrum moschatum</i> Buch.-Ham.)                                                                                                                                        | India, Bangladesh, Myanmar, Cambodia, Laos, China, Laos, Thailand, Vietnam | Otitis (India) [282]          |
| <i>Dendrobium pachyphyllum</i> (Kuntze) Bakh. f.<br>( <i>Callista pachyphylla</i> Kuntze)                                                                                                                                        | Southeast Asia                                                             |                               |
| <i>Dendrobium subulatum</i> (Bl.) Lindl.<br>( <i>Onychium subulatum</i> Bl.)                                                                                                                                                     | Thailand, Malaysia, Indonesia                                              |                               |
| <i>Dockrillia teretifolia</i> (R.Br.) Brieger<br>( <i>Dendrobium teretifolium</i> R. Br.)                                                                                                                                        | Indonesia, Papua, Australia                                                |                               |
| <i>Oberonia iridifolia</i> Lindl.<br>( <i>Oberonia ensiformis</i> (Sm.) Lindl..)                                                                                                                                                 | India, Bangladesh, Southeast Asia                                          |                               |

|                                                                                                                                                                                        |                                                                            |                         |
|----------------------------------------------------------------------------------------------------------------------------------------------------------------------------------------|----------------------------------------------------------------------------|-------------------------|
| <i>Oberonia anceps</i> Lindl.<br><i>(Oberonia lycopodioides (J.Koenig) Ormerod)</i>                                                                                                    | Southeast Asia                                                             | Boils(Indonesia) [268]  |
| <i>Oberonia laeta</i> J.J. Sm.                                                                                                                                                         | Malaysia, Indonesia                                                        |                         |
| <b><i>Oberonia rhizophoreti Schltr.</i></b><br><i>(Oberonia marina J.B.Comber)</i>                                                                                                     | Malaysia, Indonesia                                                        |                         |
| PANDANACEAE<br><i>Pandanus affinis</i> Kurz<br><i>(Benstonea affinis (Kurz) Callm. &amp; Buerki)</i>                                                                                   | Vietnam, Malaysia, Indonesia, the Philippines                              |                         |
| <i>Pandanus klossii</i> Ridl.                                                                                                                                                          | Malaysia                                                                   |                         |
| <b><i>Nypa fruticans Wurmb.</i></b><br><i>(Cocos nypa Lour., Nipa litoralis Blanco)</i>                                                                                                | India, Bangladesh, Southeast Asia, Papua, Australia                        |                         |
| <i>Pandanus tectorius</i> Parkinson                                                                                                                                                    | Indonesia, The Philippines, Papua, Australia, Pacific                      | Boils (Pacific) [281]   |
| <i>Pandanus tonkinensis</i> B.C Stone                                                                                                                                                  | Vietnam                                                                    |                         |
| POACEAE<br><i>Fimbristylis cymosa</i> R.Br.                                                                                                                                            | India, Bangladesh, Southeast Asia, Papua, Australia, Pacific               | Dysentery (India) [275] |
| <i>Fimbristylis ferruginea</i> (L.) Vahl<br><i>(Scirpus ferrugineus L., Fimbristylis sieberiana Kunth)</i>                                                                             | India, Bangladesh, Southeast Asia, Papua, Australia, Pacific               |                         |
| <i>Fimbristylis polytrichoides</i> (Retz.) Vahl<br><i>(Scirpus polytrichoides Retz.)</i>                                                                                               | India, Bangladesh, Southeast Asia, China, Papua, Australia, Pacific        |                         |
| <i>Fimbristylis sericea</i> R.Br.<br><i>(Scirpus sericeus Poir.)</i>                                                                                                                   | India, Bangladesh, Southeast Asia, China, Japan, Australia, Pacific        |                         |
| <i>Leptochloa fusca</i> (L.) Kunth<br><i>(Diplachne fusca (L.) P.Beauv. ex Roem. &amp; Schult., Diplachne malabarica (L.) Merr., Festuca fusca L., Panicum malabaricum (L.) Merr.)</i> | India, Bangladesh, Southeast Asia, China, Japan, Papua, Australia, Pacific |                         |
| <i>Paspalum vaginatum</i> Sw.<br><i>(Panicum littorale (R.Br.) Kuntze, Panicum vaginatum Nees)</i><br><i>Paspalum dissectum</i> (L.) L., <i>Digitaria foliosa</i> Lag.)                | Pacific                                                                    |                         |
| <i>Phragmites vallatoria</i> Veldkamp                                                                                                                                                  |                                                                            |                         |

|                                                                                                                                                                                                                                                                                                                                                                                                                                                                                                                                                                                                                                                                                                                                                                                                                       |                                                                                                                                                                                                                                                                                                                                                                                                                                                                     |                                                                                                                                                                               |
|-----------------------------------------------------------------------------------------------------------------------------------------------------------------------------------------------------------------------------------------------------------------------------------------------------------------------------------------------------------------------------------------------------------------------------------------------------------------------------------------------------------------------------------------------------------------------------------------------------------------------------------------------------------------------------------------------------------------------------------------------------------------------------------------------------------------------|---------------------------------------------------------------------------------------------------------------------------------------------------------------------------------------------------------------------------------------------------------------------------------------------------------------------------------------------------------------------------------------------------------------------------------------------------------------------|-------------------------------------------------------------------------------------------------------------------------------------------------------------------------------|
| <p>(<i>Phragmites karka</i> (Retz.) Trin. ex Steud.)</p> <p><i>Sporobolus virginicus</i> (L.) Kunth<br/>(<i>Agrostis virginica</i> L.)</p> <p>RUPPIACEAE<br/><i>Ruppia maritima</i> L.</p> <p>TACCACEAE<br/><i>Tacca leontopetaloides</i> (L.) Kuntze<br/>(<i>Leontice leontopetaloides</i> L.)</p>                                                                                                                                                                                                                                                                                                                                                                                                                                                                                                                   | <p>India, Bangladesh, Southeast Asia, China, Japan, Papua, Australia, Pacific</p> <p>India, Bangladesh, Southeast Asia, China, Japan, Papua, Australia, Pacific</p> <p>India, Bangladesh, Myanmar, Thailand, Malaysia Australia</p> <p>India, Bangladesh, Myanmar, Thailand, Malaysia, Indonesia, Papua, Australia</p>                                                                                                                                              |                                                                                                                                                                               |
| <p>SUBCLASS MAGNOLIIDAEE-DICOTS</p> <p>ACANTHACEAE<br/><b><i>Acanthus ebracteatus</i> Vahl</b><br/>(<i>Acanthus ilicifolius</i> L.<br/>var. <i>ebracteatus</i> (Vahl) Benoist,<br/><i>Dilivaria ebracteata</i> (Vahl) Persoon.)</p> <p><b><i>Acanthus ilicifolius</i> L.</b><br/>(<i>Acanthus xiamenensis</i> R.T. Zhang,<br/><i>Dilivaria ilicifolia</i> (L.) Juss.)</p> <p><b><i>Acanthus volubilis</i> Wall.</b><br/>(<i>Dilivaria volubilis</i> (Wall.) Nees)</p> <p><i>Hygrophila phlomoides</i> Nees</p> <p>AEGICERATAACEAE<br/><b><i>Aegiceras corniculatum</i> (L.) Blanco</b></p> <p><b><i>Aegiceras floridum</i> Roemer &amp; Schultes</b></p> <p>AIZOACEAE<br/><br/><i>Sesuvium portulacastrum</i> (L.) L.<br/>(<i>Portulaca portulacastrum</i> L.)</p> <p>ANACARDIACEAE<br/><i>Gluta velutina</i> Bl.</p> | <p>India, Myanmar, Cambodia, Thailand, Vietnam, Malaysia, Indonesia, Papua, Australia, Pacific</p> <p>Tropical Asia Pacific</p> <p>India, Bangladesh, Myanmar, Thailand, Malaysia</p> <p>Bangladesh, Myanmar, Thailand, Vietnam, Malaysia, the Philippines</p> <p>India, Bangladesh, Southeast Asia, Papua, Australia</p> <p>the Philippines, Indonesia, Papua</p> <p>Tropical Asia, Pacific</p> <p>Bangladesh, Myanmar, Thailand, Malaysia, Indonesia, Vietnam</p> | <p>Otitis (Palau)[268]</p> <p>Fever (India)[268]</p> <p>Boils (India)[268]</p> <p><u>Sores (Myanmar)[268]</u></p> <p>Otitis (India)[268]</p> <p><u>Wounds(India)[268]</u></p> |

|                                                                                         |                                                              |                               |
|-----------------------------------------------------------------------------------------|--------------------------------------------------------------|-------------------------------|
| ANNONACEAE                                                                              |                                                              |                               |
| <i>Annona palustris</i> L.                                                              | India, China, Australia                                      |                               |
| ( <i>Annona glabra</i> L.)                                                              |                                                              |                               |
| APOCYNACEAE                                                                             | Papua                                                        |                               |
| <i>Carissa papuana</i> Markgr.                                                          | Indonesia, Papua, Australia                                  |                               |
| <i>Cerbera floribunda</i> K. Schum.                                                     |                                                              |                               |
| ( <i>Cerbera batjanica</i> Teijsm. & Binn. ex Valetton)                                 |                                                              |                               |
| <i>Cerbera manghas</i> L.                                                               | Bangladesh, Southeast Asia, Papua, Australia, Pacific        |                               |
| ( <i>Cerbera forsteri</i> Seem., <i>Cerbera lactaria</i> Buch.-Ham. ex D. Dietrich      |                                                              |                               |
| <i>Cerbera venenifera</i> (Poir.) Steud., <i>Elcana seminuda</i> Blanco,                |                                                              |                               |
| <i>Tabernaemontana obtusifolia</i> Poir., <i>Tanghinia venenifera</i> Poir.)            |                                                              |                               |
| <i>Cerbera odollam</i> Gaertn.                                                          | India, Bangladesh, Southeast Asia, Papua, Australia, Pacific |                               |
| <i>Melodinus scandens</i> J.R.Forst. & G.Forst                                          | Southeast Asia                                               |                               |
| ( <i>Melodinus orientalis</i> Bl.)                                                      |                                                              |                               |
| ARALIACEAE                                                                              |                                                              |                               |
| <i>Schefflera elliptica</i> (Bl.) Harms.                                                | Andamans, Southeast Asia                                     |                               |
| ( <i>Sciadophyllum ellipticum</i> Bl.)                                                  |                                                              |                               |
| <i>Schefflera lanceolata</i> Ridl.                                                      | Malaysia                                                     |                               |
| ( <i>Heptapleurum lanceolatum</i> (Ridl.) Lowry & G.M. Plunkett)                        |                                                              |                               |
| <i>Schefflera ridleyi</i> (King) Viguier                                                | Southeast Asia                                               |                               |
| ( <i>Schefflera musangensis</i> Hend., <i>Scheffleropsis polyandra</i> (Ridley) Ridley) |                                                              |                               |
| ASCLEPIADACEAE                                                                          |                                                              | Ringworm (Thailand)[268]      |
| <i>Dischidia bengalensis</i> Colebr.                                                    | India, Bangladesh, Southeast Asia, Papua                     | Cough (Malaysia)[268]         |
| <i>Dischidia major</i> (Vahl) Merr.                                                     | India, Bangladesh, Southeast Asia, Australia                 | Wounds (the Philippines)[268] |
| ( <i>Collyris major</i> Vahl)                                                           |                                                              |                               |
| <i>Dischidia nummularia</i> R.Br.                                                       | India, Bangladesh, Southeast Asia, Australia                 |                               |
| ( <i>Collyris minor</i> Vahl, <i>Dischidia minor</i> (Vahl) Merr.,                      |                                                              |                               |
| <i>Dischidia orbicularis</i> Decne.)                                                    |                                                              | Diarrhoea (Thailand) [265]    |



|                                                                                                                                                                               |                                                     |                          |
|-------------------------------------------------------------------------------------------------------------------------------------------------------------------------------|-----------------------------------------------------|--------------------------|
| <i>Dischidia rafflesiana</i> Wall.                                                                                                                                            | India, Bangladesh, Southeast Asia                   |                          |
| <i>Finlaysonia obovata</i> Wall.<br>( <i>Finlaysonia maritima</i> Backer, <i>Olus crepitans</i> Rumph.,<br><i>Secamone maritima</i> Bl.)                                      | India, Bangladesh, Southeast Asia                   |                          |
| <i>Gymnanthera nitida</i> R. Br.<br>( <i>Gymnanthera oblonga</i> (Burm. f.) P.S. Green)                                                                                       | China, Southeast Asia, Papua, Australia             | Burns (Papua)[268]       |
| <i>Hoya australis</i> R. Br. ex J. Traille                                                                                                                                    | Indonesia, Papua, Australia, Pacific                |                          |
| <i>Hoya coronaria</i> Bl.                                                                                                                                                     |                                                     | Fever (Bangladesh)[268]  |
| <i>Hoya parasitica</i> (Roxb.) Wall. ex Wight<br>( <i>Asclepias parasitica</i> Roxb.,<br><i>Hoya hookeriana</i> Wight)                                                        | Southeast Asia<br>India, Bangladesh, Southeast Asia | Gonorrhea (India) [279]  |
| <i>Pentatropis capensis</i> (L. f.) Bullock<br>( <i>Cynanchum capense</i> L. f.)                                                                                              | India, Bangladesh, Myanmar                          |                          |
| <i>Sarcolobus carinatus</i> Wall.                                                                                                                                             | India, Bangladesh, Myanmar, Thailand, Malaysia      |                          |
| <i>Sarcolobus globosus</i> Wall.                                                                                                                                              | Malaysia, Indonesia                                 |                          |
| <b>AQUIFOLIACEAE</b><br><i>Ilex cymosa</i> Bl.                                                                                                                                |                                                     |                          |
| <i>Ilex maingayi</i> Hook.f.                                                                                                                                                  | Southeast Asia<br>Malaysia                          |                          |
| <b>ASTERACEAE</b><br><i>Pluchea indica</i> (L.) Less.<br>( <i>Baccharis indica</i> L.,<br><i>Erigeron denticulatum</i> Burm. f.)                                              | Tropical Asia and Pacific                           | Dysentery (Vietnam)[268] |
| <b>AVICENNIACEAE</b><br><b><i>Avicennia alba</i> Bl.</b><br>( <i>Avicennia marina</i> (Forssk.) Vierh., <i>Avicennia officinalis</i> L.,<br><i>Avicennia tomentosa</i> Jacq.) | India, Southeast Asia, Papua                        | Boils (Guinea) [291]     |
| <b><i>Avicennia eucalyptifolia</i> (Valeton) Zipp. ex Moldenke</b><br>( <i>Avicennia officinalis</i> var. <i>eucalyptifolia</i> Valeton)                                      | Papua, Solomons                                     | Boils (Solomons) [281]   |

|                                                                                                                            |                                                              |                               |
|----------------------------------------------------------------------------------------------------------------------------|--------------------------------------------------------------|-------------------------------|
| <i>Avicennia lanata</i> Ridl.                                                                                              | Malaysia, Indonesia, Papua                                   |                               |
| <i>Avicennia officinalis</i> L.<br>( <i>Avicennia tomentosa</i> Jacq.)                                                     | India, Bangladesh, Southeast Asia, Papua, Solomons           | Boils (Solomons) [281]        |
| BIGNONIACEAE                                                                                                               |                                                              |                               |
| <i>Dolichandrone spathacea</i> (Burm. f.) Bedd.<br>( <i>Bignonia spathacea</i> L. f.)                                      | India, Bangladesh, Southeast Asia, Papua, Australia, Pacific | Bronchitis (Indonesia)[268]   |
| BORAGINACEAE                                                                                                               |                                                              |                               |
| <i>Cordia cochinchinensis</i> Gagnep.                                                                                      | Vietnam, Cambodia, Thailand                                  |                               |
| <i>Cordia dichotoma</i> G. Forst.<br>( <i>Varronia sinensis</i> Lour.)                                                     | India, Bangladesh, Southeast Asia, Papua, Australia          | Boils (the Philippines)[268]  |
| CASUARINACEAE                                                                                                              |                                                              |                               |
| <i>Casuarina equisetifolia</i> L.<br>( <i>Casuarina litorea</i> L. ex Fosberg & Sacht).                                    | India, Bangladesh, Southeast Asia, Papua, Australia, Pacific | Diarrhoea (India) [269]       |
| CHENOPODIACEAE                                                                                                             |                                                              |                               |
| <i>Atriplex jubata</i> S. Moore                                                                                            | New Caledonia                                                |                               |
| <i>Sarcocornia quinqueflora</i> (Bunge ex Ung.-Sternb.)<br>( <i>Salicornia quinqueflora</i> Bunge ex Ung.-Sternb.)         | Australia                                                    |                               |
| <i>Salicornia brachiata</i> Miq.                                                                                           | India, Bangladesh, Myanmar, Thailand                         | Infection (Pakistan)[268]     |
| <i>Suaeda maritima</i> (L.) Dumort.<br>( <i>Chenopodium australe</i> R. Br., <i>Chenopodium maritimum</i> L.)              | India, Thailand, Vietnam, Korea. Japan                       | Hepatitis (India)[268]        |
| CHRYSOBALANACEAE                                                                                                           |                                                              |                               |
| <i>Atuna racemosa</i> Raf.                                                                                                 | Southeast Asia, Papua, Pacific                               | Diarrhoea (Indonesia) [267]   |
| COMBRETACEAE                                                                                                               |                                                              |                               |
| <i>Combretum quadrangulare</i> Kurz                                                                                        | Myanmar, Thailand, Laos, Vietnam                             |                               |
| <i>Lumnitzera littoralis</i> (Jack) Voigt<br>( <i>Lumnitzera purpurea</i> (Gaudich.) C. Presl)                             | India, Bangladesh, Southeast, Papua, Australia               | Trush (the Philippines) [285] |
| <i>Lumnitzera racemosa</i> Willd.<br>( <i>Laguncularia purpurea</i> Gaudich., <i>Lumnitzera rosea</i> (Gaudich.) C. Presl) | India, Bangladesh, Southeast, Papua, Australia               |                               |

|                                                                                                                                                                                                   |                                                   |                           |
|---------------------------------------------------------------------------------------------------------------------------------------------------------------------------------------------------|---------------------------------------------------|---------------------------|
| <p><i>Terminalia catappa</i> L.<br/>(<i>Myrobalanus catappa</i> (L.) Kuntze,<br/><i>Terminalia latifolia</i> Blanco, <i>Terminalia moluccana</i> Lam.)</p>                                        | India, Bangladesh, Southeast, Papua, Australia    | Bronchitis (India) [268]  |
| <p>CONVOLVULACEAE</p> <p><i>Ipomoea pes-caprae</i> (L.) R. Br.<br/>(<i>Convolvulus bilobatus</i> Roxb., <i>Convolvulus brasiliensis</i> L.)</p>                                                   | India, Bangladesh, Southeast Asia, Papua, Pacific | Diarrhoea (Cambodia)[268] |
| <p>CLUSIACEAE</p> <p><i>Calophyllum inophyllum</i> L.<br/>(<i>Calophyllum bintagor</i> Roxb.)</p>                                                                                                 | India, Bangladesh, Southeast Asia, Papua, Pacific | Gonorrhoea (Myanmar)[268] |
| <p>EBENACEAE</p> <p><i>Diospyros areolata</i> King &amp; Gamble</p>                                                                                                                               | India, Bangladesh, Southeast Asia, Papua, Pacific |                           |
| <p><i>Diospyros compacta</i> (R. Br.) Kosterm.<br/>(<i>Maba compacta</i> R. Br.)</p>                                                                                                              | Malaysia, Indonesia                               |                           |
| <p><i>Diospyros ferrea</i> (Willd.) Bakh.<br/>(<i>Maba littorea</i> R. Br., <i>Maba ebenus</i> Wight)</p>                                                                                         | Australia                                         |                           |
| <p><b><i>Diospyros littorea</i> (R. Br.) Kosterm.</b><br/>(<i>Maba littorea</i> R. Br.)</p>                                                                                                       | India, Bangladesh, Southeast Asia, Papua          | Diarrhoea (India)[268]    |
| <p><i>Diospyros malabarica</i> (Descr.) Kostel</p>                                                                                                                                                | Southeast Asia, Papua                             |                           |
| <p><i>Diospyros maritima</i> Bl.<br/>(<i>Diospyros kusanoi</i> Hayata,<br/><i>Diospyros liukuensis</i> Makino)</p>                                                                                | India, Bangladesh, Southeast Asia                 |                           |
| <p>ERICACEAE</p> <p><i>Rhododendron brookeanum</i> Low<br/>ex Lindl. var. <i>brookeanum</i><br/>(<i>Azalea brookeana</i> Low ex Lindl.)</p>                                                       | Southeast Asia, Taiwan, Papua, Australia          |                           |
| <p>EUPHORBIACEAE</p> <p><i>Blumeodendron tokbrai</i> (Bl.) Kurz<br/>(<i>Elateriospermum tokbrai</i> Bl., <i>Mallotus tokbrai</i> (Bl.) Müll. Arg.,<br/><i>Rottlera tokbrai</i> (Bl.) Scheff.)</p> | Borneo                                            |                           |
|                                                                                                                                                                                                   | Indonesia, Papua                                  |                           |

|                                                                                                                                          |                                                              |                         |
|------------------------------------------------------------------------------------------------------------------------------------------|--------------------------------------------------------------|-------------------------|
| <i>Breynia racemosa</i> (Bl.) Muell. Arg.                                                                                                | Southeast Asia, Papua                                        | Leprosy (Papua) [291]   |
| <i>Croton heterocarpus</i> Müll. Arg.<br>( <i>Oxydectes heterocarpa</i> (Müll. Arg.) Kuntze)                                             | Malaysia, Indonesia                                          |                         |
| <b><i>Excoecaria agallocha</i> L.</b><br>( <i>Commia cochinchinensis</i> Lour.)                                                          | India, Bangladesh, Southeast Asia, Papua, Australia, Pacific |                         |
| <b><i>Excoecaria indica</i> (Willd.) Müll. Arg.</b><br>( <i>Sapium indicum</i> Willd.)                                                   | India, Bangladesh, Southeast Asia, Papua                     |                         |
| <i>Suregada glomerulata</i> (Bl.) Baill.                                                                                                 | Southeast Asia, Papua, Australia                             | Boils (Bangladesh)[268] |
| <b>FABACEAE</b><br><i>Caesalpinia bonduc</i> (L.) Roxb.<br>( <i>Caesalpinia bonducella</i> (L.) Fleming,<br><i>Guilandina bonduc</i> L.) | India, Bangladesh, Southeast Asia, Papua, Australia, Pacific |                         |
| <i>Canavalia cathartica</i> Thouars<br>( <i>Lablab microcarpus</i> DC.)                                                                  | India, Bangladesh, Southeast Asia, Papua, Australia, Pacific |                         |
| <i>Canavalia lineata</i> (Thunb.) DC.<br>( <i>Dolichos lineatus</i> Thunb.)                                                              | Bangladesh, Myanmar, Thailand, Vietnam, China, Korea, Japan  |                         |
| <i>Canavalia maritima</i> Thouars<br>( <i>Canavalia obtusifolia</i> (Lam.) DC.)                                                          | India, Bangladesh, Southeast Asia, Papua, Australia, Pacific | Fever (Indonesia)[268]  |
| <i>Cathormion umbellatum</i> (Vahl) Kosterm.<br>( <i>Albizia umbellata</i> (Vahl) E. J. M. Koenen)                                       | India, Bangladesh, Southeast Asia, Papua, Australia          |                         |
| <b><i>Cynometra iripa</i> Kostel.</b>                                                                                                    | India, Bangladesh, Southeast Asia, Papua, Australia          |                         |
| <i>Cynometra ramiflora</i> Miq.                                                                                                          | India, Bangladesh, Southeast Asia, Papua, Australia          |                         |
| <i>Dalbergia candenatensis</i> (Dennst.) Prain<br>( <i>Cassia candenatensis</i> Dennst.)                                                 | India, Bangladesh, Southeast Asia, Papua, Australia, Pacific |                         |
| <i>Derris heptaphylla</i> Merr.                                                                                                          | India, Bangladesh, Southeast Asia, Papua                     |                         |
| <i>Derris pinnata</i> (Lour.) Prain<br>( <i>Dalbergia pinnata</i> (Lour.) Prain)                                                         | India, Bangladesh, Southeast Asia, China                     |                         |
| <i>Derris scandens</i> (Aubl.) Pittier<br>( <i>Deguelia scandens</i> Aubl.)                                                              | India, Bangladesh, Southeast Asia, Papua, Australia          |                         |

|                                                                                                                                                                                         |                                                                 |                                  |
|-----------------------------------------------------------------------------------------------------------------------------------------------------------------------------------------|-----------------------------------------------------------------|----------------------------------|
| <i>Derris trifoliata</i> Lour.<br>( <i>Pongamia uliginosa</i> (Roxb. ex Willd.) DC.,<br><i>Dalbergia heterophylla</i> Willd.,<br><i>Deguelia uliginosa</i> (Roxb. ex Willd.) Baill.)    | India, Bangladesh, Southeast Asia, Papua                        | UTI (Solomons) [286]             |
| <i>Inocarpus fagifer</i> (Parkinson) Fosb<br>( <i>Inocarpus edulis</i> J.R. Forst. & G. Forst)                                                                                          | Southeast Asia, Papua, Pacific                                  | Diarrhoea (Fiji) [270]           |
| <i>Intsia bijuga</i> (Colebr.) Kuntze<br>( <i>Macrobium bijugum</i> Colebr.)                                                                                                            | India, Bangladesh, Southeast Asia, Papua, Australia,<br>Pacific | Diarrhoea (India) [269]          |
| <i>Pongamia pinnata</i> (L.) Pierre<br>( <i>Cytisus pinnatus</i> L., <i>Derris indica</i> (Lam.) Bennet,<br><i>Milletia pinnata</i> (Linnaeus) Panigrahi, <i>Pongamia glabra</i> Vent.) | India, Bangladesh, Southeast Asia, Papua, Australia,<br>Pacific |                                  |
| <i>Serianthes grandiflora</i> Benth.<br><br>( <i>Serianthes dilmyi</i> Fosberg)                                                                                                         | Southeast Asia, Papua                                           |                                  |
| <i>Sindora siamensis</i> Teysm. ex Miq.                                                                                                                                                 | India, Bangladesh, Myanmar, Thailand, Cambodia,<br>Vietnam      |                                  |
| <i>Wallaceodendron celebicum</i> Koord.                                                                                                                                                 | Indonesia, the Philippines                                      |                                  |
| FLACOURTIACEAE<br><i>Hydnocarpus ilicifolia</i> King                                                                                                                                    | Thailand, Vietnam, Malaysia<br><br>Indonesia, the Philippines   |                                  |
| <i>Scolopia luzonensis</i> (Presl.) Warb.                                                                                                                                               | Myanmar, Thailand, Cambodia, Vietnam, Malaysia,<br>Indonesia    |                                  |
| <i>Scolopia macrophylla</i> (W. & A.) Clos                                                                                                                                              |                                                                 |                                  |
| <i>Xylosma suluense</i> Merr.                                                                                                                                                           | Malaysia, Indonesia, the Philippines                            | Fever (Samoa) [268]              |
| GENTIANACEAE<br><i>Fagraea crenulata</i> Maingay ex C.B. Clarke                                                                                                                         | Vietnam, Thailand, Malaysia, Indonesia                          |                                  |
| <i>Fagraea berteriana</i> A. Gray ex Benth.                                                                                                                                             | Pacific                                                         | Dysentery (the Philippines)[268] |
| GOODENIACEAE<br><i>Scaevola hainanensis</i> Hance                                                                                                                                       | Vietnam, China                                                  |                                  |
| <i>Scaevola taccada</i> (Gaertn.) Roxb.                                                                                                                                                 | India, Bangladesh, Southeast Asia, Papua, Australia,<br>Pacific |                                  |

|                                                                                                                                                                                                                                                                                                                                                                                                                                                                                                                                                                                                                                                                                                                                                                                                                                                                                                                                                                                                                                                                                                                                                                                                                                                                                                                                                                                                                                    |                                                                                                                                                                                                                                                                                                                                                                                                                                                                           |                                                                                                                    |
|------------------------------------------------------------------------------------------------------------------------------------------------------------------------------------------------------------------------------------------------------------------------------------------------------------------------------------------------------------------------------------------------------------------------------------------------------------------------------------------------------------------------------------------------------------------------------------------------------------------------------------------------------------------------------------------------------------------------------------------------------------------------------------------------------------------------------------------------------------------------------------------------------------------------------------------------------------------------------------------------------------------------------------------------------------------------------------------------------------------------------------------------------------------------------------------------------------------------------------------------------------------------------------------------------------------------------------------------------------------------------------------------------------------------------------|---------------------------------------------------------------------------------------------------------------------------------------------------------------------------------------------------------------------------------------------------------------------------------------------------------------------------------------------------------------------------------------------------------------------------------------------------------------------------|--------------------------------------------------------------------------------------------------------------------|
| <p>(<i>Lobelia frutescens</i> Mill., <i>Lobelia taccada</i> Gaertn., <i>Scaevola piliplena</i> Miq., <i>Scaevola sericea</i> Vahl)</p> <p>HERNANDIACEAE</p> <p><i>Hernandia ovigera</i> L.<br/>(<i>Hernandia sonora</i> L.)</p> <p><i>Hernandia nymphaeifolia</i> (C. Presl) Kubitzki<br/>(<i>Biasolettia nymphaeifolia</i> C. Presl,<br/><i>Hernandia peltata</i> Meisn.)</p> <p>ICACINACEAE</p> <p><i>Merrilliodendron megacarpum</i> Sleumer<br/>(<i>Stemonurus megacarpus</i> Hemsl.)</p> <p>LAURACEAE</p> <p><i>Cassytha filiformis</i> L.<br/>(<i>Calodium cochinchinense</i> Lour., <i>Cassytha zeylanica</i> Gaertn.,<br/><i>Cassytha dissitiflora</i> Meisn, <i>Cassytha aphylla</i> (Forssk.) Raeusch.)</p> <p>LECYTHIDACEAE</p> <p><i>Barringtonia acutangula</i> (L.) Gaertn.<br/>( <i>Barringtonia luzonensis</i> (Presl) Vidal)</p> <p><i>Barringtonia asiatica</i> (L.) Kurz<br/>(<i>Barringtonia butonica</i> J.R. Forst.,<br/><i>Barringtonia speciosa</i> J.R. Forst. &amp; G. Forst.)</p> <p><i>Barringtonia conoidea</i> Griff.<br/>(<i>Barringtonia alata</i> Wall.)</p> <p><i>Barringtonia macrostachya</i> Hook.f.</p> <p><i>Barringtonia racemosa</i> (L.) Spreng<br/>(<i>Barringtonia ceylanica</i> (Miers) Gardner ex C.B. Clarke,<br/><i>Barringtonia elongata</i> Korth., <i>Barringtonia timorensis</i> Bl.)</p> <p>LOPHOPYXIDACEAE</p> <p><i>Lophopyxis maingayi</i> Hook.f.</p> <p>LORANTHACEAE</p> | <p>Southeast Asia, Papua, Australia, Pacific</p> <p>Tropical Asia and Pacific</p> <p>Indonesia, Philippines, Papua</p> <p>India, Bangladesh, Southeast Asia, Papua, Australia, Pacific</p> <p>India, Bangladesh, Southeast Asia, Papua, Australia, Pacific</p> <p>India, Bangladesh, Southeast Asia, Papua, Australia, Pacific</p> <p>Myanmar, Malaysia, Indonesia</p> <p>Southeast Asia, Papua</p> <p>India to Pacific</p> <p>Southeast Asia, Papua</p> <p>Indonesia</p> | <p>UTI (Fiji)[268]</p> <p>Syphilis (Vietnam) [287]</p> <p>Cholera (Bangladesh)[268]</p> <p>Otitis (Palau)[268]</p> |
|------------------------------------------------------------------------------------------------------------------------------------------------------------------------------------------------------------------------------------------------------------------------------------------------------------------------------------------------------------------------------------------------------------------------------------------------------------------------------------------------------------------------------------------------------------------------------------------------------------------------------------------------------------------------------------------------------------------------------------------------------------------------------------------------------------------------------------------------------------------------------------------------------------------------------------------------------------------------------------------------------------------------------------------------------------------------------------------------------------------------------------------------------------------------------------------------------------------------------------------------------------------------------------------------------------------------------------------------------------------------------------------------------------------------------------|---------------------------------------------------------------------------------------------------------------------------------------------------------------------------------------------------------------------------------------------------------------------------------------------------------------------------------------------------------------------------------------------------------------------------------------------------------------------------|--------------------------------------------------------------------------------------------------------------------|

|                                                                                                                                                          |                                                              |                                       |
|----------------------------------------------------------------------------------------------------------------------------------------------------------|--------------------------------------------------------------|---------------------------------------|
| <b><i>Amyema anisomeres</i> Danser</b>                                                                                                                   | Southeast Asia                                               |                                       |
| <b><i>Amyema gravis</i> Danser</b><br>( <i>Loranthus obovatus</i> Schröt. & Back.)                                                                       | Indonesia, Papua, Australia                                  | Wounds (Malaysia)[268]                |
| <b><i>Amyema mackayensis</i> (Blakely) Danser</b><br>( <i>Loranthus mackayensis</i> Blakely)                                                             | Bangladesh, Southeast Asia, China                            |                                       |
| <i>Dendrophthoe pentandra</i> (L.) Miq.<br>( <i>Loranthus pentandrus</i> L.)                                                                             | China, Southeast Asia, Papua                                 |                                       |
| <i>Macrosolen cochinchinensis</i> (Lour.) Tiegh.<br>( <i>Loranthus cochinchinensis</i> Lour.)                                                            | Bangladesh, Southeast Asia, China, Australia                 |                                       |
| <i>Viscum ovalifolium</i> DC<br>( <i>Viscum pedunculatum</i> Barlow)                                                                                     | India                                                        |                                       |
| <i>Viscum orientale</i> Willd.                                                                                                                           | India, Bangladesh, Southeast Asia, Papua, Australia          |                                       |
| LYTHRACEAE                                                                                                                                               |                                                              |                                       |
| <b><i>Pemphis acidula</i> J.R. &amp; G. Forst.</b><br>( <i>Lythrum pemphis</i> L.f., <i>Pemphis angustifolia</i> Roxb.,<br><i>Pemphis setosa</i> Blanco) | Southeast Asia, Papua, Pacific                               | Diarrhoea (Bangladesh) [271]          |
| MALVACEAE                                                                                                                                                |                                                              |                                       |
| <b><i>Brownlowia argentata</i> Kurz</b>                                                                                                                  | India, Bangladesh, Southeast Asia                            | Leprosy (New Guinea) [291]            |
| <b><i>Brownlowia tersa</i> (L.) Kosterm</b><br>( <i>Glabraria tersa</i> L.)                                                                              | Papua, Australia                                             |                                       |
| <b><i>Camptostemon schultzei</i> Mast.</b>                                                                                                               | Indonesia, the Philippines, Papua                            | Dysentery (the Philippines)[268]      |
| <b><i>Camptostemon philippinense</i> (S. Vidal) Becc.</b><br><br>( <i>Cumingia philippinensis</i> S. Vidal)                                              | Bangladesh, Southeast Asia, China, Pacific                   | <i>Eye infection (Solomons) [289]</i> |
| <i>Hibiscus tiliaceus</i> L.<br>( <i>Hibiscus boninensis</i> Nakai, <i>Hibiscus tortuosus</i> Roxb.,<br><i>Talipariti tiliaceum</i> (L.) Fryxell)        | Bangladesh, Vietnam, China, Malaysia                         | <i>Diarrhoea (India) [272]</i>        |
| <i>Kleinhovia hospita</i> L.                                                                                                                             | India, Bangladesh, Myanmar, Thailand, Malaysia               | Colds (Solomons)[268]                 |
|                                                                                                                                                          | India, Bangladesh, Southeast Asia, Papua, Australia, Pacific |                                       |

|                                                                                                                                                                                                                                                                                                                                                                                                                                                                                                                                                                                                                                                                                                                                                                                                                                                                                                                                                                                                                                                                                                                                                                                                                                                                                                                                                                                                                                                                                                                                       |                                                                                                                                                                                                                                                                                                                                                                                                                                                                                                                                                                           |                                                                                                                                                          |
|---------------------------------------------------------------------------------------------------------------------------------------------------------------------------------------------------------------------------------------------------------------------------------------------------------------------------------------------------------------------------------------------------------------------------------------------------------------------------------------------------------------------------------------------------------------------------------------------------------------------------------------------------------------------------------------------------------------------------------------------------------------------------------------------------------------------------------------------------------------------------------------------------------------------------------------------------------------------------------------------------------------------------------------------------------------------------------------------------------------------------------------------------------------------------------------------------------------------------------------------------------------------------------------------------------------------------------------------------------------------------------------------------------------------------------------------------------------------------------------------------------------------------------------|---------------------------------------------------------------------------------------------------------------------------------------------------------------------------------------------------------------------------------------------------------------------------------------------------------------------------------------------------------------------------------------------------------------------------------------------------------------------------------------------------------------------------------------------------------------------------|----------------------------------------------------------------------------------------------------------------------------------------------------------|
| <p><i>Malachra capitata</i> (L.) L.<br/>(<i>Sida capitata</i> L.)</p> <p><i>Thespesia populnea</i> (L.) Soland. ex Correa<br/>(<i>Hibiscus baccifer</i> Bl., <i>Hibiscus populneus</i> L.,<br/><i>Thespesia macrophylla</i> Bl., <i>Thespesia populneoides</i> (Roxb.) Kostel.)</p> <p>MELASTOMATACEAE</p> <p><i>Melastoma saigonense</i> (Kuntze) Merr.<br/>(<i>Osbeckia saigonensis</i> Kuntze)</p> <p><i>Ochthocharis borneensis</i> Bl.</p> <p><i>Pachycentria constricta</i> (Bl.) Bl.<br/>(<i>Melastoma constrictum</i> Bl.)</p> <p>MELIACEAE<br/><b><i>Aglaia cucullata</i> Pellegr.</b><br/>(<i>Amoora cucullata</i> Roxb., <i>Aphanamixis cucullata</i> (Roxb.) M.R. Almeida)</p> <p><b><i>Xylocarpus granatum</i> J. Koenig</b><br/>(<i>Carapa granatum</i> (J. Koenig) Alston,<br/><i>Carapa obovata</i> Bl., <i>Xylocarpus obovatus</i> Juss)</p> <p><b><i>Xylocarpus moluccensis</i> (Lam.) M. Roem.</b><br/>(<i>Carapa moluccensis</i> Lam.,<br/><i>Xylocarpus mekongensis</i> Pierre)</p> <p><b><i>Xylocarpus rumphii</i> (Kostel.) Mabb.</b></p> <p>MORACEAE<br/><i>Ficus microcarpa</i> L.f.<br/>(<i>Ficus littoralis</i> Bl., <i>Ficus retusa</i> L., <i>Ficus nitida</i> Thunb.)</p> <p><i>Malaisia scandens</i> (Lour.) Planch<br/>(<i>Caturus scandens</i> Lour., <i>Malaisia tortuosa</i> Blanco,<br/><i>Trophis scandens</i> (Lour.) Hook. &amp; Arn.)</p> <p>MYOPORACEAE<br/><i>Myoporum bontiodes</i> (Siebold &amp; Zucc.) A. Gray<br/><br/>(<i>Polycoelium bontiodes</i> (Siebold &amp; Zucc.) A. DC.)</p> | <p>Myanmar, Thailand, Cambodia, Vietnam</p> <p>Vietnam, Malaysia, Borneo</p> <p>Southeast Asia</p> <p>India, Bangladesh, Southeast Asia, Papua</p> <p>India, Bangladesh, Southeast Asia, Papua, Pacific</p> <p>India, Bangladesh, Southeast Asia, Papua, Australia, Pacific</p> <p>India, Bangladesh, Southeast Asia, Papua, Australia, Pacific</p> <p>India, Bangladesh, Southeast Asia, Papua, Australia, Pacific</p> <p>Southeast Asia, China, Papua, Australia, Pacific</p> <p>Vietnam, China, Japan</p> <p>New Caledonia</p> <p>Sri Lanka, Southeast Asia, Papua</p> | <p>Post-partum (Vietnam) [272]</p> <p>Dysentery (India)[268]</p> <p>Dysentery (Yap)[268]</p> <p>Cholera (Myanmar)[268]</p> <p>Diarrhoea (China)[269]</p> |
|---------------------------------------------------------------------------------------------------------------------------------------------------------------------------------------------------------------------------------------------------------------------------------------------------------------------------------------------------------------------------------------------------------------------------------------------------------------------------------------------------------------------------------------------------------------------------------------------------------------------------------------------------------------------------------------------------------------------------------------------------------------------------------------------------------------------------------------------------------------------------------------------------------------------------------------------------------------------------------------------------------------------------------------------------------------------------------------------------------------------------------------------------------------------------------------------------------------------------------------------------------------------------------------------------------------------------------------------------------------------------------------------------------------------------------------------------------------------------------------------------------------------------------------|---------------------------------------------------------------------------------------------------------------------------------------------------------------------------------------------------------------------------------------------------------------------------------------------------------------------------------------------------------------------------------------------------------------------------------------------------------------------------------------------------------------------------------------------------------------------------|----------------------------------------------------------------------------------------------------------------------------------------------------------|



|                                                                                                                                                                            |                                                              |                             |
|----------------------------------------------------------------------------------------------------------------------------------------------------------------------------|--------------------------------------------------------------|-----------------------------|
| <i>Myoporum tenuifolium</i> G.Forsl.                                                                                                                                       | Papua                                                        |                             |
| MYRISTICACEAE                                                                                                                                                              |                                                              |                             |
| <i>Horsfieldia irya</i> (Gaertn.) Warb.                                                                                                                                    | Myanmar, Thailand, Cambodia, Vietnam                         | Wounds (Indonesia)[268]     |
| <i>Myristica hollrungii</i> Warb.                                                                                                                                          |                                                              |                             |
| MYRSINACEAE                                                                                                                                                                |                                                              |                             |
| <i>Rapanea porteriana</i> (Wall. ex A. DC.) Mez<br>( <i>Myrsine porteriana</i> Wall. ex A. DC.)                                                                            | Southeast Asia, Papua, Australia                             |                             |
|                                                                                                                                                                            | Southeast Asia, Papua, Australia, Pacific                    |                             |
| MYRTACEAE                                                                                                                                                                  |                                                              |                             |
| <i>Melaleuca cajuputi</i> Roxb.                                                                                                                                            | Indonesia, the Philippines, Papua, Australia                 |                             |
| <i>Melaleuca quinquenervia</i> (Cav.) S.T. Blake<br>( <i>Metrosideros quinquenervia</i> Cav.)                                                                              | Southeast Asia                                               |                             |
| <b><i>Osbornia octodonta</i> F. Muell.</b>                                                                                                                                 | India, Sri Lanka, Bangladesh, Southeast Asia, Papua, Pacific |                             |
| OLACAEAE                                                                                                                                                                   |                                                              |                             |
| <i>Anacolosia frutescens</i> (Bl.) Bl.<br>( <i>Stemonurus frutescens</i> Bl.)                                                                                              | India, Sri Lanka, Bangladesh, Southeast Asia                 | Fever (China)[268]          |
| <i>Olex imbricata</i> Roxb.<br>( <i>Olex wightiana</i> Wall. ex Wight & Arn.,<br><i>Ximenia olacoides</i> Wight & Arn.)                                                    | India, Sri Lanka, Bangladesh, Southeast Asia                 |                             |
| <i>Olex scandens</i> Roxb.                                                                                                                                                 | India, Sri Lanka, Bangladesh, Southeast Asia, Papua, Pacific | Tonsilitis (Indonesia)[268] |
| <i>Strombosia ceylanica</i> Gardner                                                                                                                                        |                                                              |                             |
| <i>Ximenia americana</i> L.<br>( <i>Ximenia aculeata</i> Crantz, <i>Ximenia elliptica</i> G. Forst.)                                                                       | India, Sri Lanka, Bangladesh, Southeast Asia                 |                             |
| PHYLLANTHACEAE                                                                                                                                                             |                                                              |                             |
| <i>Glochidion littorale</i> Bl.<br>( <i>Bradleia littorea</i> (Bl.) Steud.,<br><i>Diasperus litoralis</i> (Bl.) Kuntze,<br><i>Phyllanthus littoralis</i> (Bl.) Müll. Arg.) | Indonesia, Papua, Australia                                  |                             |
|                                                                                                                                                                            | India, Bangladesh, Myanmar, Thailand, Malaysia               | Cough (Thailand)[268]       |
| PLUMBAGINACEAE                                                                                                                                                             |                                                              |                             |
| <b><i>Aegialitis annulata</i> R.Br.</b>                                                                                                                                    | Korea, Japan                                                 |                             |

|                                                                                                                                                                                                   |                                                                  |                                              |
|---------------------------------------------------------------------------------------------------------------------------------------------------------------------------------------------------|------------------------------------------------------------------|----------------------------------------------|
| <i>(Aegialinites annulata</i> (R. Br.) C. Presl)                                                                                                                                                  |                                                                  |                                              |
| <b><i>Aegialitis rotundifolia</i> Roxb.</b>                                                                                                                                                       | India, Bangladesh, Southeast Asia, Papua, Australia              |                                              |
| <i>Limonium tetragonum</i> (Thunb.) Bullock                                                                                                                                                       |                                                                  | Dysentery (Palau)[268]                       |
| RHIZOPHORACEAE                                                                                                                                                                                    |                                                                  |                                              |
| <b><i>Bruguiera cylindrica</i> (L.) Bl.</b>                                                                                                                                                       | Indonesia, Papua, Australia                                      |                                              |
| <i>(Bruguiera caryophylloides</i> (Burm. f.) Bl., <i>Rhizophora cylindrica</i> L.,<br><i>Rhizophora cylindrica</i> L.)                                                                            | India, Bangladesh, Southeast Asia, Papua, Australia,<br>Pacific  |                                              |
| <b><i>Bruguiera exaristata</i> Ding Hou</b>                                                                                                                                                       | Southeast Asia, Papua, Australia                                 | Burns (India)[268]                           |
| <b><i>Bruguiera gymnorhiza</i> (L.) Savigny</b><br><i>(Rhizophora gymnorhiza</i> L.)                                                                                                              | Malaysia<br>India, Bangladesh, Southeast Asia, Papua, Australia  | Wounds (India)[268]<br>Fever (Malaysia)[268] |
| <b><i>Bruguiera hainesii</i> C.G.Rogers</b>                                                                                                                                                       |                                                                  |                                              |
| <b><i>Bruguiera paviflora</i> (Roxb.) Wight.</b>                                                                                                                                                  | India, Bangladesh, Southeast Asia, Papua, Australia              | Sores (Australia) [280]                      |
| <b><i>Bruguiera sexangula</i> (Lour.) Poir.</b><br><i>(Bruguiera eriopetala</i> Wight & Arn., <i>Bruguiera sexangula</i> var.<br><i>rhynchopetala</i> W.C. Ko, <i>Rhizophora sexangula</i> Lour.) | Indonesia, Papua, Australia                                      |                                              |
| <i>Carallia brachiata</i> (Lour.) Merr.                                                                                                                                                           | Indonesia, Papua, Australia                                      | <u>Postpartum (Malaysia)[268]</u>            |
| <i>Carallia suffruticosa</i> Ridl.<br><i>(Carallia fascicularis</i> Guill)                                                                                                                        |                                                                  |                                              |
| <b><i>Ceriops australis</i> (C.T. White)</b><br><b>Ballment, T.J.Sm. &amp; J.A. Stoddart</b><br><i>(Ceriops tagal</i> var. <i>australis</i> C.T. White)                                           | Malaysia<br>India, Southeast Asia, Papua, Australia              |                                              |
| <b><i>Ceriops decandra</i> (Griff.) Ding Hou</b>                                                                                                                                                  | India, Southeast Asia, Papua                                     | Postpartum (Malaysia)[268]                   |
| <b><i>Ceriops tagal</i> (Perr.) C.B. Rob.</b><br><i>(Ceriops candolleana</i> Arn.)                                                                                                                | Vietnam, China, Japan<br>Southeast Asia, China, Papua, Australia |                                              |
| <i>Kandelia candel</i> (L.) Druce<br><i>(Kandelia rheedii</i> Wight & Arn., <i>Rhizophora candel</i> L.)                                                                                          |                                                                  |                                              |

|                                                                                                                                                                                                                                                                                                                                                                                                                                                                                                                                                                                                                                                                                                                                                                                                                                                                                                                                                                                                                                                                                                                                                                                                                                                                                                                                                                                                                                                                                                   |                                                                                                                                                                                                                                                                                                                                                                                                                                                                                                                                                                                                                                           |                                                                                                                        |
|---------------------------------------------------------------------------------------------------------------------------------------------------------------------------------------------------------------------------------------------------------------------------------------------------------------------------------------------------------------------------------------------------------------------------------------------------------------------------------------------------------------------------------------------------------------------------------------------------------------------------------------------------------------------------------------------------------------------------------------------------------------------------------------------------------------------------------------------------------------------------------------------------------------------------------------------------------------------------------------------------------------------------------------------------------------------------------------------------------------------------------------------------------------------------------------------------------------------------------------------------------------------------------------------------------------------------------------------------------------------------------------------------------------------------------------------------------------------------------------------------|-------------------------------------------------------------------------------------------------------------------------------------------------------------------------------------------------------------------------------------------------------------------------------------------------------------------------------------------------------------------------------------------------------------------------------------------------------------------------------------------------------------------------------------------------------------------------------------------------------------------------------------------|------------------------------------------------------------------------------------------------------------------------|
| <p><i>Kandelia obovata</i> Sheue H.Y. Liu &amp; J. Yong</p> <p><b><i>Rhizophora apiculata</i> Bl.</b><br/> <i>(Rhizophora candelaria</i> DC.,<i>Rhizophora conjugata</i> L., <i>Rhizophora mangle</i> L., <i>Rhizophora mucronata</i> Lam., <i>Rhizophora longissima</i> Blanco, <i>Rhizophora macrorrhiza</i> Griff.)</p> <p><b><i>Rhizophora stylosa</i> Griff.</b><br/> <i>(Rhizophora mucronata</i> var. <i>stylosa</i> (Griff.) Schimp.)</p> <p>RUBIACEAE<br/> <i>Gardenia lucida</i> Roxb.<br/> <i>(Gardenia resinifera</i> Roth)</p> <p><i>Guettarda speciosa</i> L.<br/> <i>(Matthiola speciosa</i> (L.) Kuntze)</p> <p><i>Hydnophytum formicarum</i> Jack<br/> <i>(Hydnophytum orbiculatum</i> Elmer, <i>Lasiosstoma formicarum</i> (Jack) Spreng.)</p> <p><i>Ixora timorensis</i> Decne.</p> <p><i>Morinda citrifolia</i> L.<br/> <i>(Morinda bracteata</i> Roxb., <i>Morinda ligulata</i> Blanco, <i>Morinda multiflora</i> Roxb.)</p> <p><i>Myrmecodia tuberosa</i> Jack<br/> <i>(Lasiosstoma tuberosum</i> (Jack) Spreng.)</p> <p><i>Psychotria serpens</i> L.<br/> <i>(Psychotria scandens</i> Hook. &amp; Arn.)</p> <p><i>Scyphiphora hydrophyllacea</i> C.F. Gaertn.</p> <p>RUTACEAE<br/> <i>Acronychia pedunculata</i> (L.) Miq.<br/> <i>(Acronychia laurifolia</i> Bl., <i>Acronychia apiculata</i> Miq., <i>Jambolifera pedunculata</i> L.)</p> <p><i>Atalantia monophylla</i> DC.<br/> <i>(Limonia monophylla</i> L.)</p> <p><i>Linnocitrus littoralis</i> (Miq.) Swingle</p> | <p>Southeast Asia, China, Papua, Australia</p> <p>India, Bangladesh, Myanmar</p> <p>India, Bangladesh, Southeast Asia, Papua</p> <p>Southeast Asia, Papua</p> <p>Indonesia, Papua, Australia</p> <p>India, Bangladesh, Southeast Asia, Papua, Australia, Pacific</p> <p>Southeast Asia, Papua, Pacific</p> <p>Thailand, Cambodia, Vietnam, China, Japan</p> <p>India, Bangladesh, Southeast Asia, Papua, Australia, Pacific</p> <p>India, Bangladesh, Southeast Asia, China, Papua, Australia</p> <p>India, Bangladesh, Myanmar, Thailand, Cambodia, Vietnam, Malaysia</p> <p>Vietnam</p> <p>India, Bangladesh, Southeast Asia, Papua</p> | <p>Abscess (Cambodia)[268]</p> <p>Chancre (Palau)[268]</p> <p>Dysentery (India) [270]</p> <p>Fever (Thailand)[268]</p> |
|---------------------------------------------------------------------------------------------------------------------------------------------------------------------------------------------------------------------------------------------------------------------------------------------------------------------------------------------------------------------------------------------------------------------------------------------------------------------------------------------------------------------------------------------------------------------------------------------------------------------------------------------------------------------------------------------------------------------------------------------------------------------------------------------------------------------------------------------------------------------------------------------------------------------------------------------------------------------------------------------------------------------------------------------------------------------------------------------------------------------------------------------------------------------------------------------------------------------------------------------------------------------------------------------------------------------------------------------------------------------------------------------------------------------------------------------------------------------------------------------------|-------------------------------------------------------------------------------------------------------------------------------------------------------------------------------------------------------------------------------------------------------------------------------------------------------------------------------------------------------------------------------------------------------------------------------------------------------------------------------------------------------------------------------------------------------------------------------------------------------------------------------------------|------------------------------------------------------------------------------------------------------------------------|

|                                                                                                                |                                                                           |                      |
|----------------------------------------------------------------------------------------------------------------|---------------------------------------------------------------------------|----------------------|
| <i>(Pleiospermium littorale</i> (Miq.) Tanaka)                                                                 | India, Cambodia , Southeast Asia                                          |                      |
| <i>Merope angulata</i> Swingle                                                                                 |                                                                           |                      |
| SALVADORACEAE                                                                                                  |                                                                           |                      |
| <i>Azima sarmentosa</i> (Bl.) B. & H.<br>( <i>Actegeton sarmentosa</i> Bl.)                                    | India, Bangladesh, Myanmar, Thailand                                      |                      |
| <i>Azima tetracantha</i> Lam.                                                                                  | India, Southeast Asia                                                     |                      |
| SAPINDACEAE                                                                                                    |                                                                           |                      |
| <i>Allophylus cobbe</i> (L.) Raeusch<br>( <i>Rhus cobbe</i> L.)                                                | India, Bangladesh, Southeast Asia, China, Papua, Australia, Pacific       |                      |
| <i>Harpullia arborea</i> (Blanco) Radlk<br>( <i>Ptelea arborea</i> Blanco)                                     | Papua                                                                     |                      |
| <i>Harpullia crustacea</i> Radlk.                                                                              | Papua                                                                     |                      |
| <i>Harpullia hirsuta</i> Radlk.                                                                                | Papua                                                                     |                      |
| <i>Harpullia leptococca</i> Radlk.                                                                             | Southeast Asia, Papua                                                     |                      |
| <i>Mischocarpus sundaicus</i> Bl.                                                                              | Bangladesh, Nicobar Islands, Southeast Asia, Papua New, Guinea, Australia |                      |
| <i>Planchonella obovata</i> (R.Br.) Pierre.<br>( <i>Sersalisia obovata</i> R. Br.)                             | Cambodia, Vietnam                                                         |                      |
| SIMAROUBACEAE                                                                                                  |                                                                           |                      |
| <i>Quassia harmandiana</i> (Pierre) Nooteboom<br>( <i>Samadera harmandiana</i> Pierre)                         | Bangladesh, Southeast Asia, Papua                                         | Leprosy (India)[268] |
| <i>Quassia indica</i> (Gaertn.) Nooteboom<br>( <i>Samadera indica</i> Gaertn., <i>Vitmania elliptica</i> Vahl) | Pacific                                                                   |                      |
|                                                                                                                | Pacific                                                                   |                      |
| SOLANACEAE                                                                                                     |                                                                           |                      |
| <i>Solanum inamoenum</i> Benth.                                                                                | India, Sri Lanka, Bangladesh, Myanmar                                     |                      |
| <i>Solanum viride</i> R.Br.                                                                                    | Southeast Asia, Papua, Australia, Pacific Islands                         |                      |
| SONNERATIACEAE                                                                                                 |                                                                           |                      |
| <i>Sonneratia apetala</i> Buch.-Ham.                                                                           |                                                                           |                      |
| <i>Sonneratia griffithii</i> Kurtz.                                                                            |                                                                           |                      |

|                                                                                                                                                                                                                                                                                                                                                                                                                                                                                                                                                                                                                                                                                                                                                                                                                                                                                                                                                                                                                                                                                                                                                                                                                                                                                                                                        |                                                                                                                                                                                                                                                                                                                                                                                                                                                                                           |                                                                                                                                        |
|----------------------------------------------------------------------------------------------------------------------------------------------------------------------------------------------------------------------------------------------------------------------------------------------------------------------------------------------------------------------------------------------------------------------------------------------------------------------------------------------------------------------------------------------------------------------------------------------------------------------------------------------------------------------------------------------------------------------------------------------------------------------------------------------------------------------------------------------------------------------------------------------------------------------------------------------------------------------------------------------------------------------------------------------------------------------------------------------------------------------------------------------------------------------------------------------------------------------------------------------------------------------------------------------------------------------------------------|-------------------------------------------------------------------------------------------------------------------------------------------------------------------------------------------------------------------------------------------------------------------------------------------------------------------------------------------------------------------------------------------------------------------------------------------------------------------------------------------|----------------------------------------------------------------------------------------------------------------------------------------|
| <p>(<i>Chiratia leucantha</i> Montrouz., <i>Sonneratia acida</i> Benth., <i>Sonneratia alba</i> J. Smith, <i>Sonneratia caseolaris</i> (L.) Engl., <i>Sonneratia iriomotensis</i> Masam., <i>Sonneratia mossambicensis</i> Klotzsch ex Peters, <i>Sonneratia pagatpat</i> Blanco)</p> <p><b><i>Sonneratia ovata</i> Back.</b></p> <p>STERCULIACEAE<br/> <b><i>Heritiera littoralis</i> Aiton</b><br/> <i>(Balanopteris minor</i> Gaertn.,<br/> <i>Balanopteris totila</i> Gaertn., <i>Heritiera minor</i> Roxb.</p> <p><b><i>Heritiera fomes</i> Buch. Ham.</b></p> <p><b><i>Heritiera globosa</i> Kostermans</b></p> <p>STYRACACEAE<br/> <i>Styrax agrestis</i> (Lour.) G. Don<br/> <i>(Cyrtia agrestis</i> Lour., <i>Styrax rostratus</i> Hosok., <i>Styrax subcrenatus</i> Hand.-Mazz.)</p> <p>SYMPLOCACEAE<br/> <i>Symplocos celastriifolia</i> Griff. ex Clarke</p> <p>STERMONURACEAE<br/> <i>Stemonurus ammui</i> Sleumer</p> <p>VERBENACEAE<br/> <i>Premna odorata</i> Blanco<br/> <i>(Gumira odorata</i> (Blanco) Kuntze, <i>Premna vestita</i> Schauer)</p> <p><i>Premna integrifolia</i> L.<br/> <i>(Premna corymbosa</i> Rottler &amp; Willd., <i>Premna serratifolia</i> L.)</p> <p>VITACEAE<br/> <i>Cayratia trifolia</i> (L.) Domin<br/> <i>(Causonis trifolia</i> (L.) Mabb. &amp; J.Wen, <i>Vitis trifolia</i> L.)</p> | <p>Southeast Asia, China</p> <p>India, Sri Lanka, Bangladesh, Southeast Asia, Papua</p> <p>India, Bangladesh, Myanmar, Myanmar, Malaysia</p> <p>Borneo</p> <p>Vietnam</p> <p>India, Bangladesh, Southeast Asia, China, Papua, Australia, Pacific</p> <p>Papua</p> <p>India, Bangladesh, Southeast Asia, China, Papua, Australia</p> <p>India, Bangladesh, Southeast Asia, China, Papua, Australia, Pacific</p> <p>India, Bangladesh, Southeast Asia, China, Papua, Australia, Pacific</p> | <p>Diarrhoea (Bangladesh)[268]</p> <p>Tuberculosis (the Philippines)[268]</p> <p>Fever (Papua)[268]</p> <p>Abscess (Thailand)[268]</p> |
|----------------------------------------------------------------------------------------------------------------------------------------------------------------------------------------------------------------------------------------------------------------------------------------------------------------------------------------------------------------------------------------------------------------------------------------------------------------------------------------------------------------------------------------------------------------------------------------------------------------------------------------------------------------------------------------------------------------------------------------------------------------------------------------------------------------------------------------------------------------------------------------------------------------------------------------------------------------------------------------------------------------------------------------------------------------------------------------------------------------------------------------------------------------------------------------------------------------------------------------------------------------------------------------------------------------------------------------|-------------------------------------------------------------------------------------------------------------------------------------------------------------------------------------------------------------------------------------------------------------------------------------------------------------------------------------------------------------------------------------------------------------------------------------------------------------------------------------------|----------------------------------------------------------------------------------------------------------------------------------------|

Bold: true mangrove plants [3]
