# Supplementary material for: Antimicrobial Secondary Metabolites from the Mangrove Plants of Asia and the Pacific
Source: MDPI journal article supplement (doi:10.3390/md20100643), 2022-10-15
Supplement: s1 [file s1]

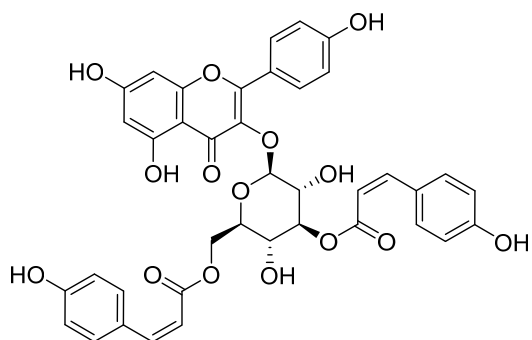

(1)

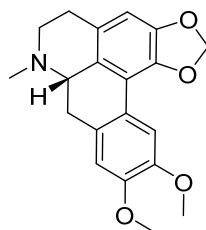

(2)

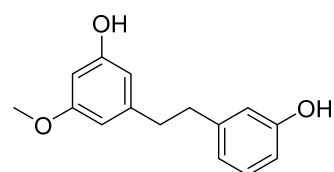

(4)

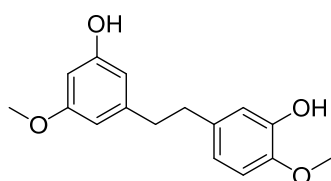

(5)

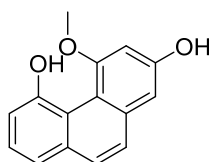

(6)

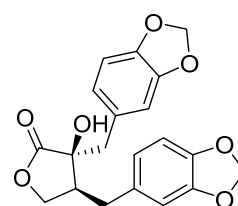

(7)

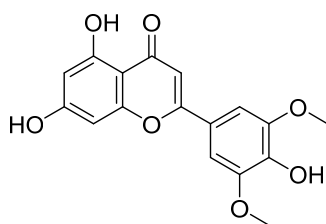

(8)

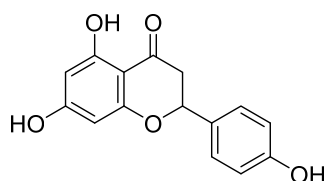

(9)

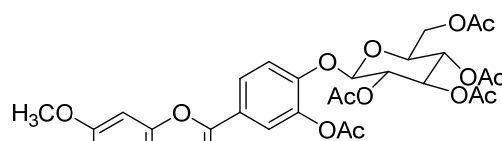

(10)

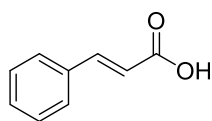

(11)

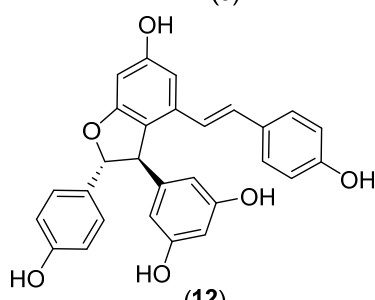

(12)

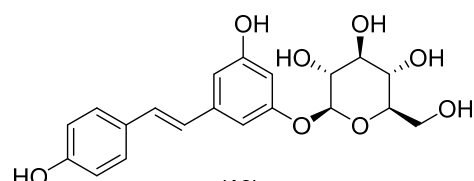

(13)

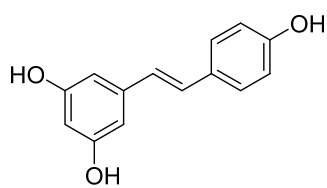

(14)

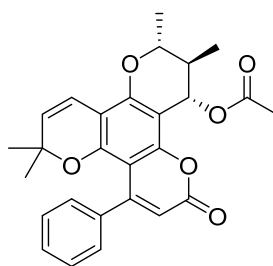

(16)

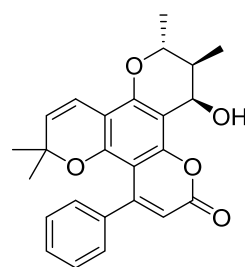

(17)

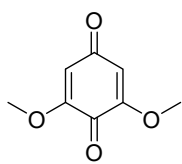

(20)

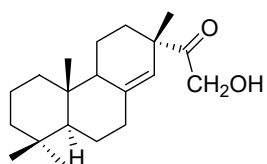

(22)

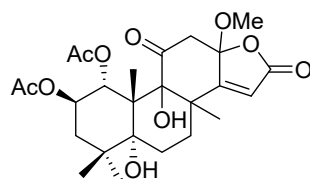

(23)

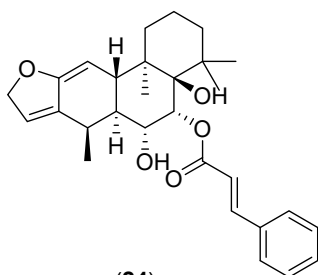

(24)

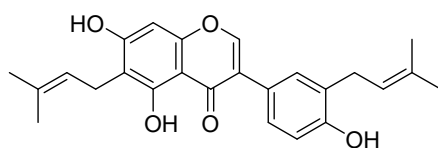

(25)

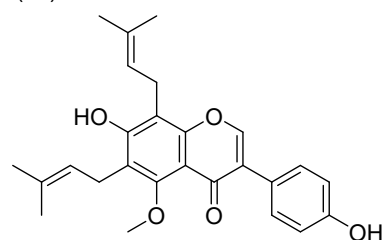

(26)

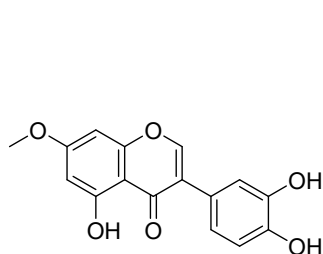

(27)

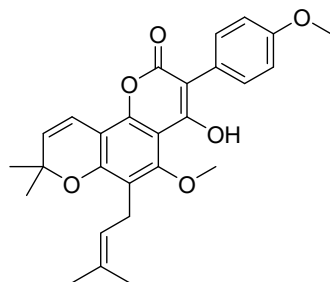

(28)

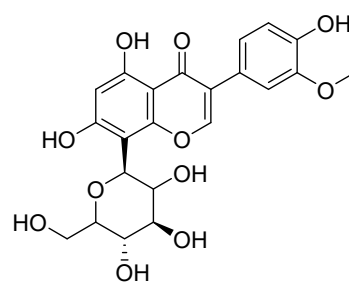

(29)

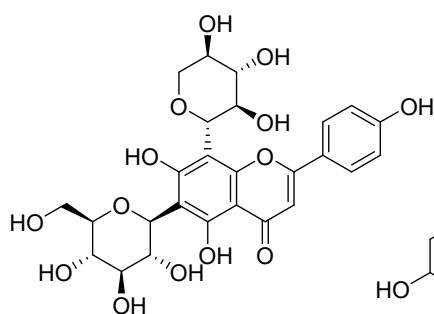

(30)

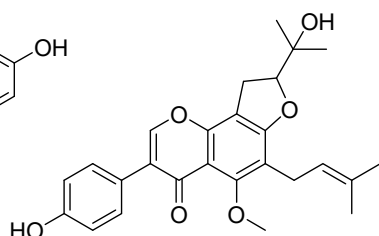

(31)

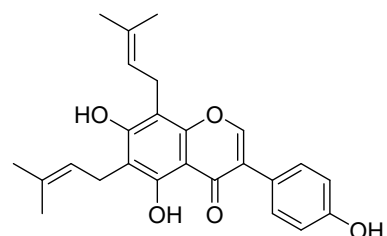

(32)

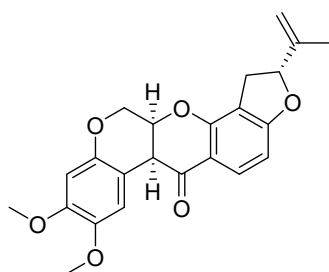

(34)

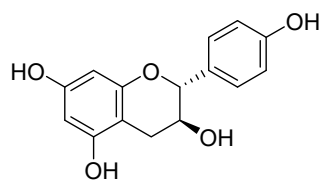

(36)

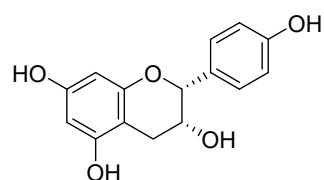

(37)

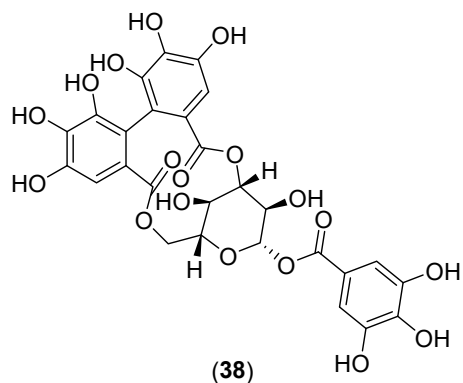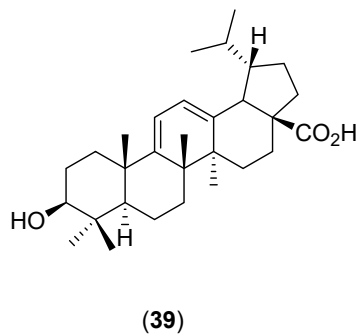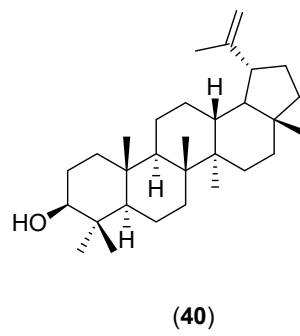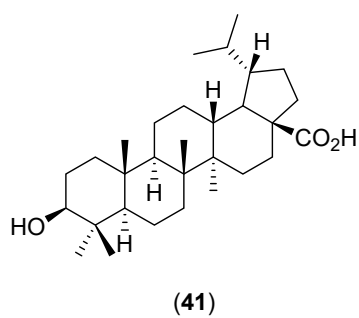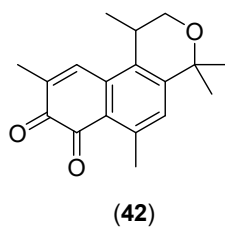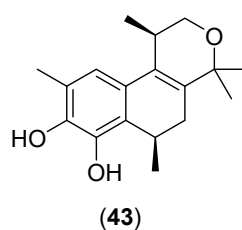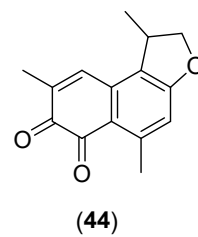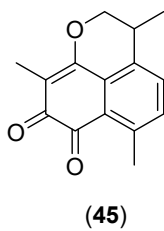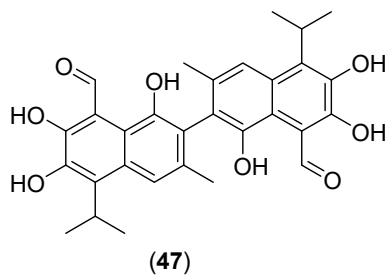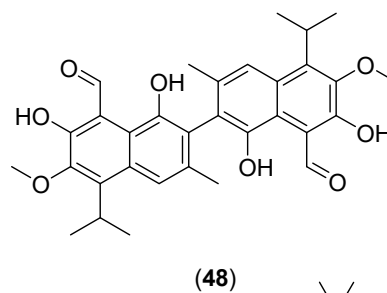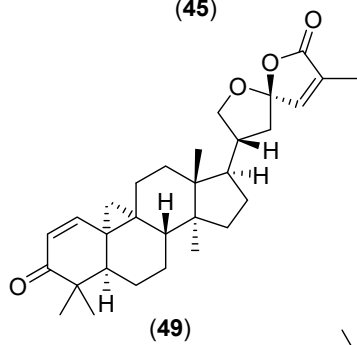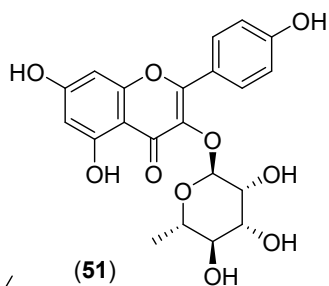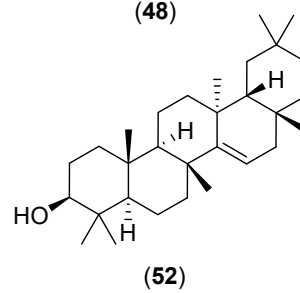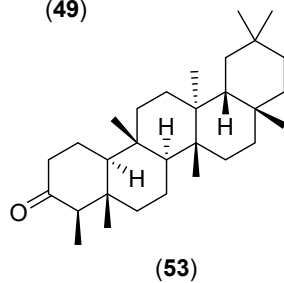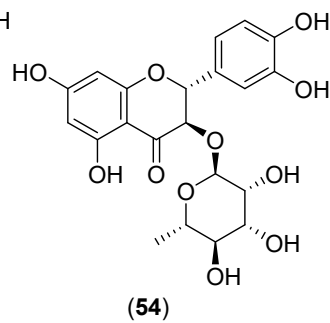

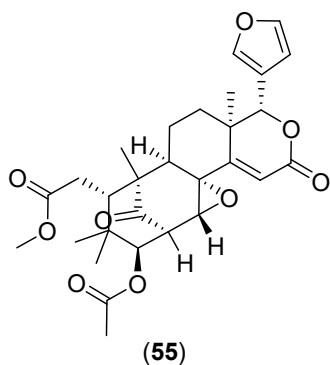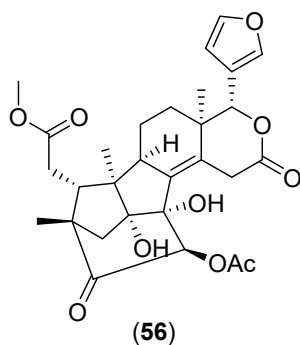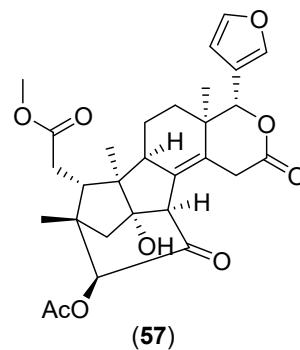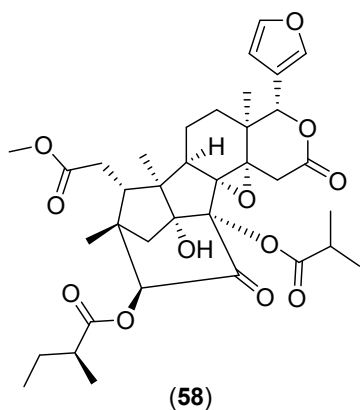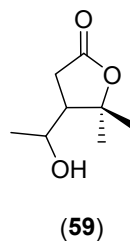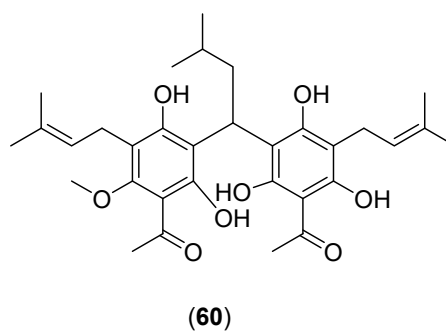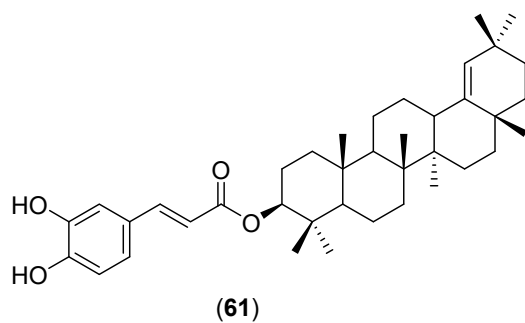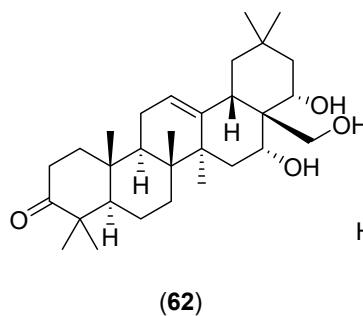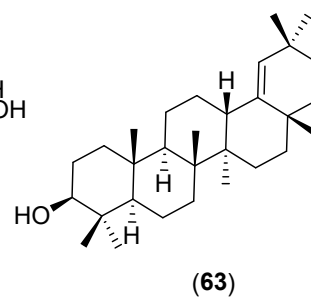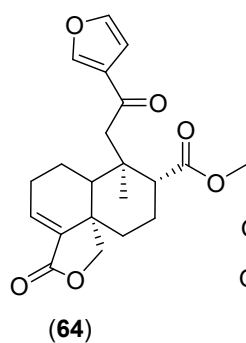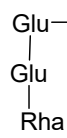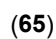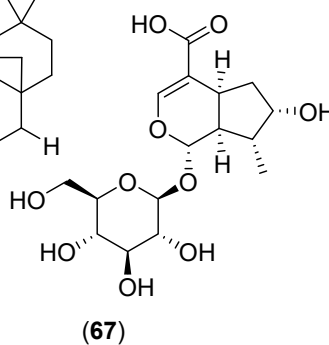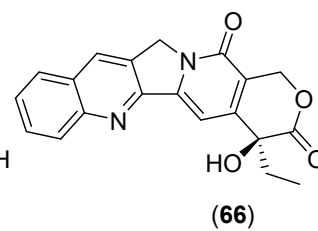

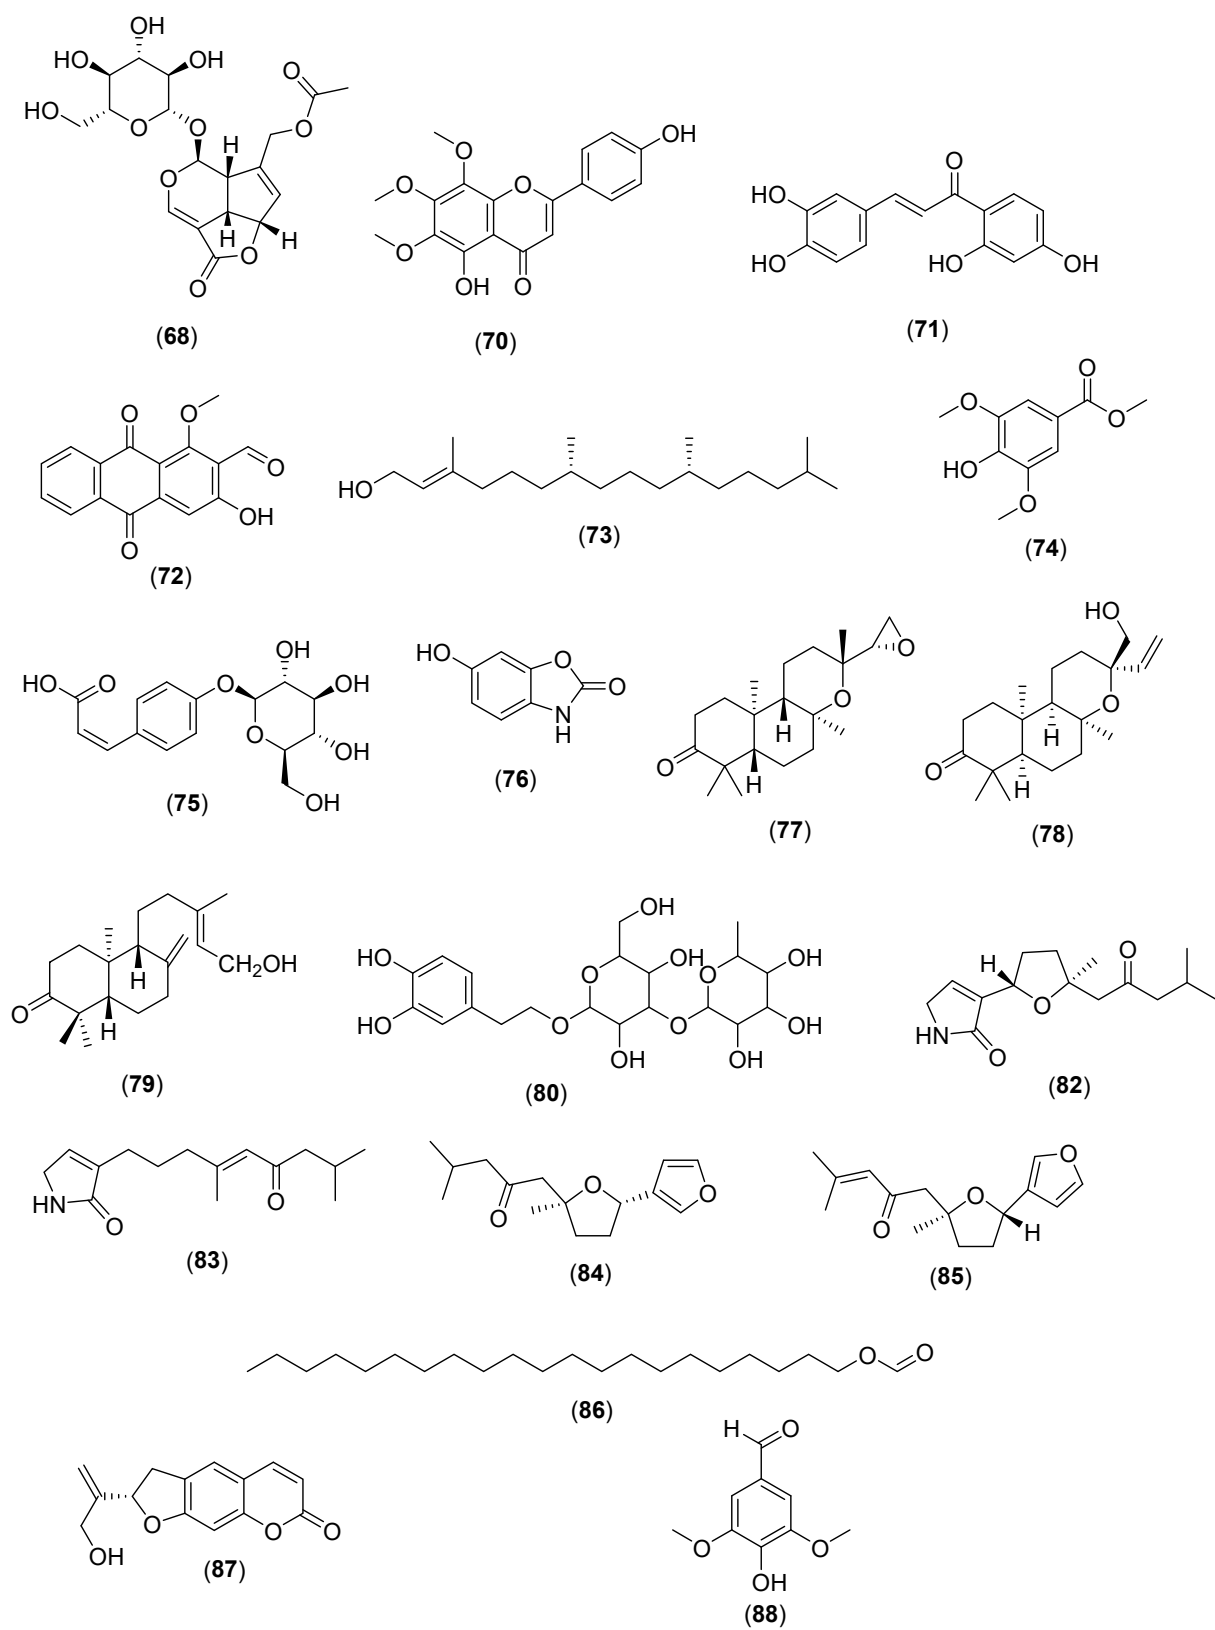

**Figure S1.** Natural products from the plants of the mangroves, tidal rivers, and the seashores of Asia and the Pacific
